# Supplementary material for: Single-cell transcriptome analysis reveals reciprocal epithelial and endothelial cell evolution in ovarian cancer
Source: PubMed Central journal article supplement — iScience. 2024 Nov 19;27(12):111417. doi: 10.1016/j.isci.2024.111417 (PMC11665315; doi:10.1016/j.isci.2024.111417), 2024-11-19
Supplement: mmc1.pdf [file mmc1.pdf]

**Supplemental information**

**Single-cell transcriptome analysis reveals  
reciprocal epithelial and endothelial  
cell evolution in ovarian cancer**

**Langchao Liang, Chaochao Chai, Anmin Liu, Aisha Shigna Nadukkandy, Sowmiya Kalaiselvan, Camilla Blunk Brandt, Wandong Zhao, Hanbo Li, Lin Lin, Jianmin Wu, and Yonglun Luo**

## **Supplementary Information**

This supplementary information file includes the following Supplementary Figures and Supplementary Tables:

- Supplementary Figure S1 to S5
- Supplementary Table S1-S4, S7-S8, S12-S14

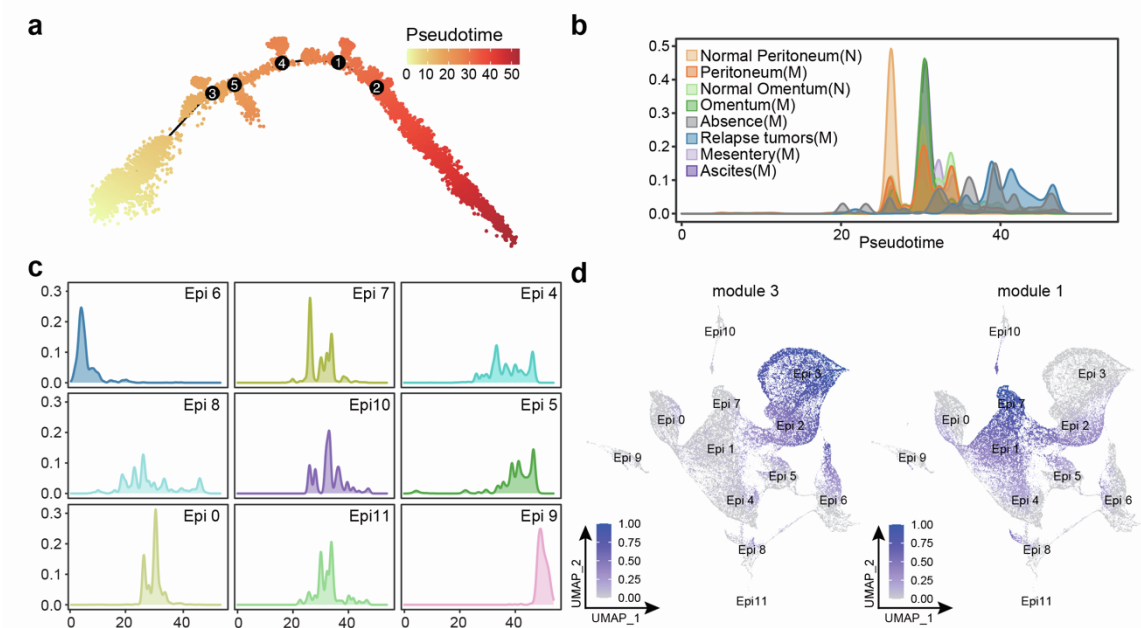

**Figure S1. Pseudo-time analysis of ovarian cancers epithelial cells, related to Figure 1**

**a.** Pseudo-time analysis of ovarian cancers epithelial cells inferred by Monocle2. Each data point corresponds to a single cell. The colors of the data points represent pseudo time. **b.** Proportional changes of different tissue types along the ovarian cancer epithelial cell pseudotime trajectory. **c.** The proportion of ovarian cancer epithelia cell sub cluster on the pseudo-time trajectory. **d.** Feature plot displays the weights of module 3 and module 1.

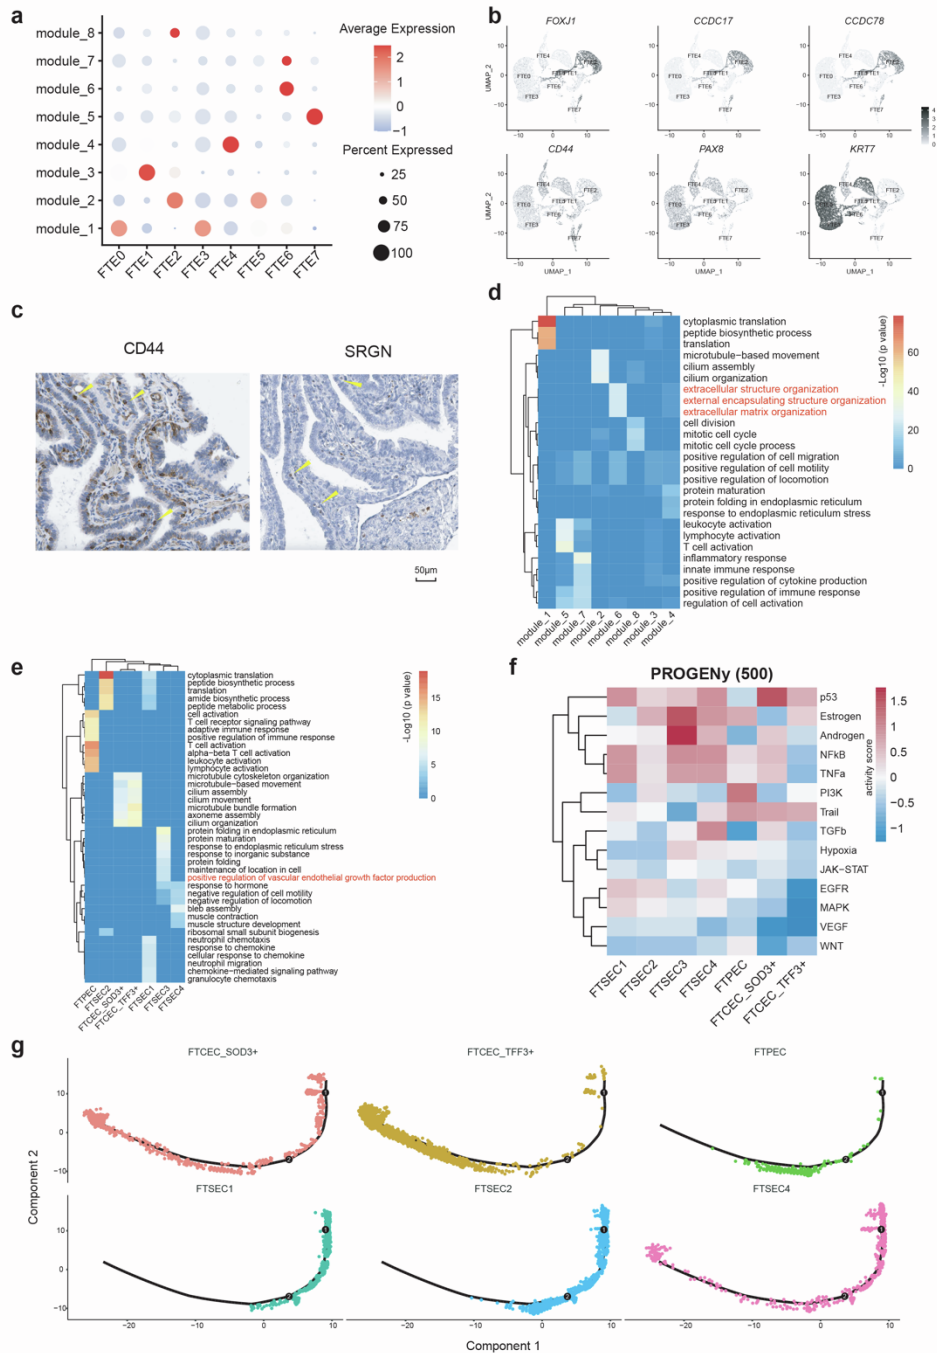

**Figure S2. NMF, GO and Pseudo-time analyses of epithelial subgroup cells from fallopian tube, related to Figure 2.**

**a.** Dot plot displays the weights of NMF modules within each epithelial subgroup of the fallopian tube. **b.** The UMAP plots show fallopian tube epithelial cell, color-coded for the expression of indicated marker genes. **c.** Expression of CD44 and SRGN proteins in fallopian tubes. Images from The Human Protein Atlas. **d.** GO enrichment result of top 100 contribution genes of 8 gene modules. **e.** The heatmap shows the differentially enriched GO terms in each epithelial subgroup of the fallopian tube. **f.** Mean pathway activity scores of fallopian tubes epithelial cell sub cluster. **g.** Position of different epithelial cell sub cluster along the fallopian tubes epithelial cell pseudotime trajectory.

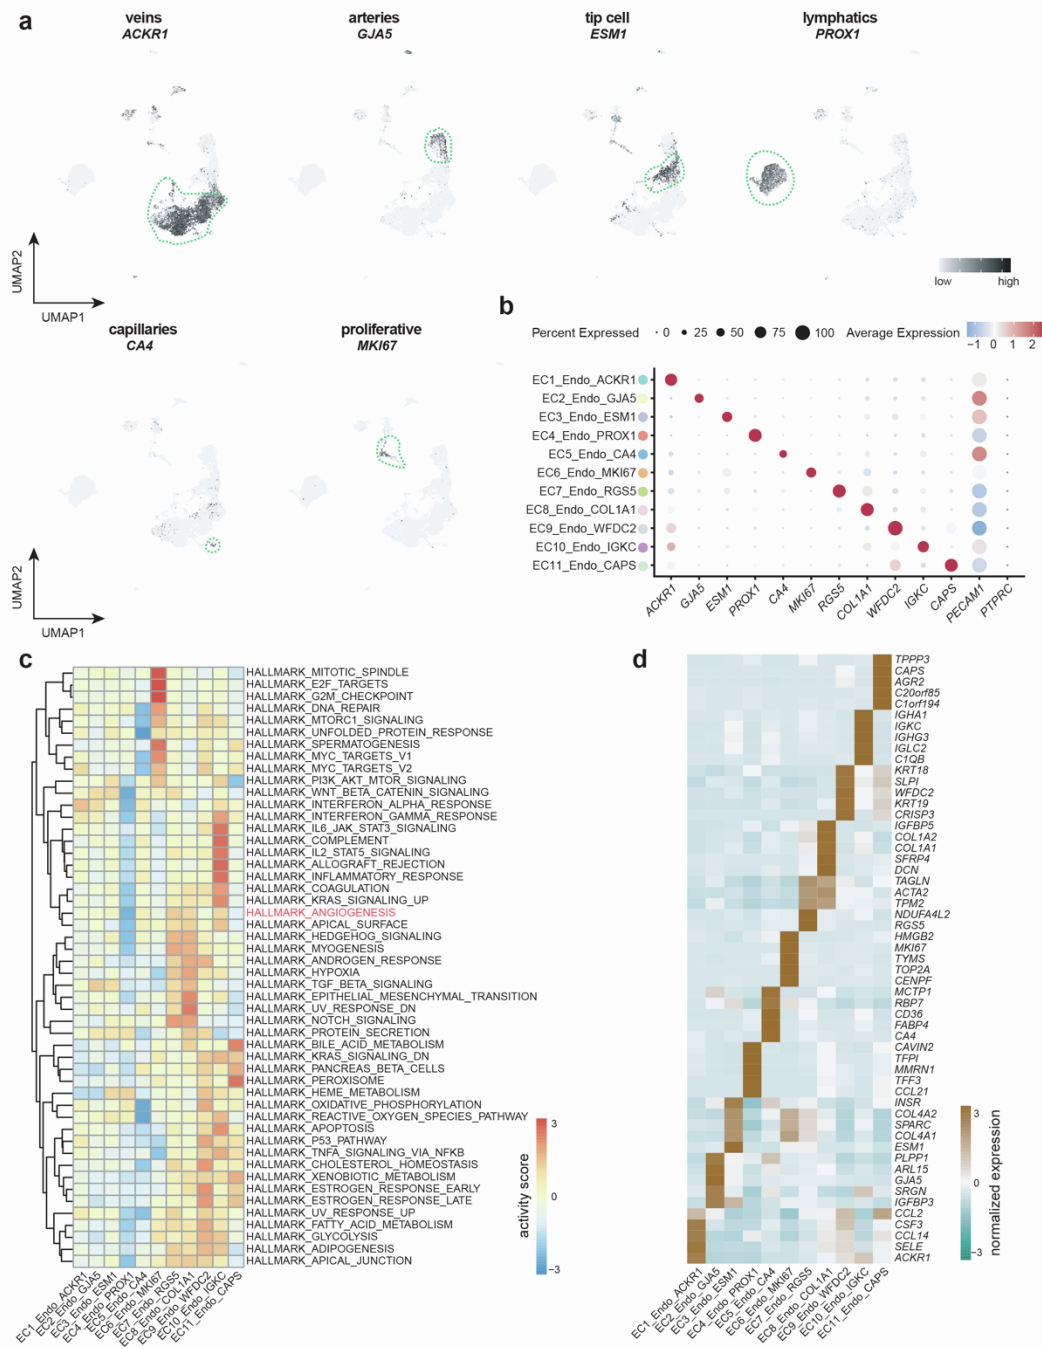

**Figure S3. Marker and Hallmark analysis of endothelial cell clusters, related to Figure 3.**

**a.** The UMAP plots of ovarian cancer endothelial cells, color-coded for the expression of indicated marker genes. **b.** Bubble plot displays expression patterns of selected genes across indicated clusters. **c.** Activation of Hallmark pathways (scored per cell by GSVA) in 11 endothelial cell sub-clusters. **d.** Gene expression levels of top-ranking marker genes in different endothelial cell sub-clusters. In this and all further heatmaps depicting marker genes, colors indicate row-wise scaled gene expression with a mean of 0 and an SD of 1 (Z scores).

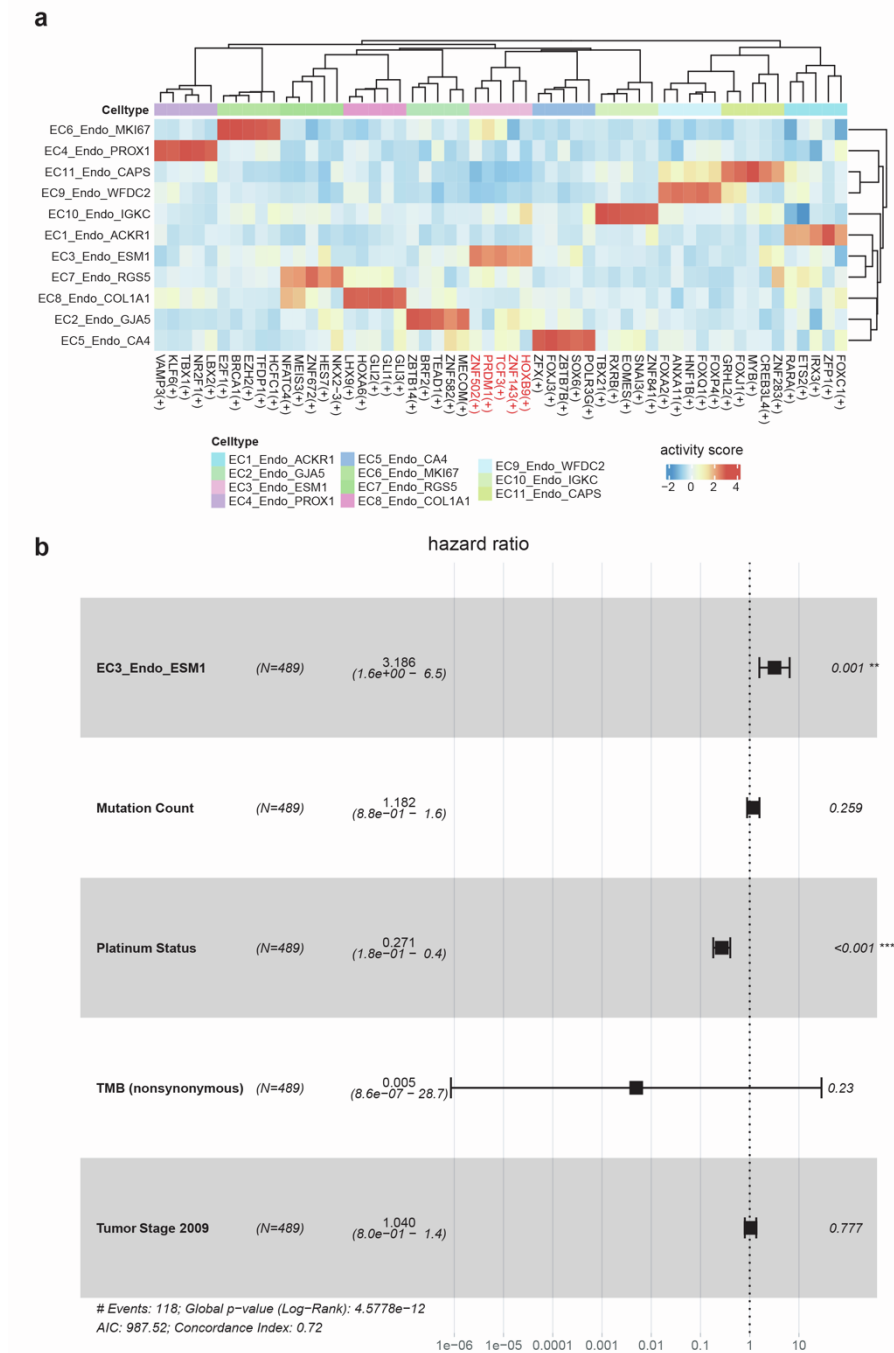

**Figure S4. Transcription factor and cox-ph analyses of endothelial cell clusters, related to Figure 3 and 4:**

**a.** Heatmap of transcription factor (TF) activity in 11 endothelial cell sub clusters. **b.** Forest plot of multivariable Cox-PH regression model. Data are represented as Hazard Ratio (HR) with 95% Confidence Interval (CI).

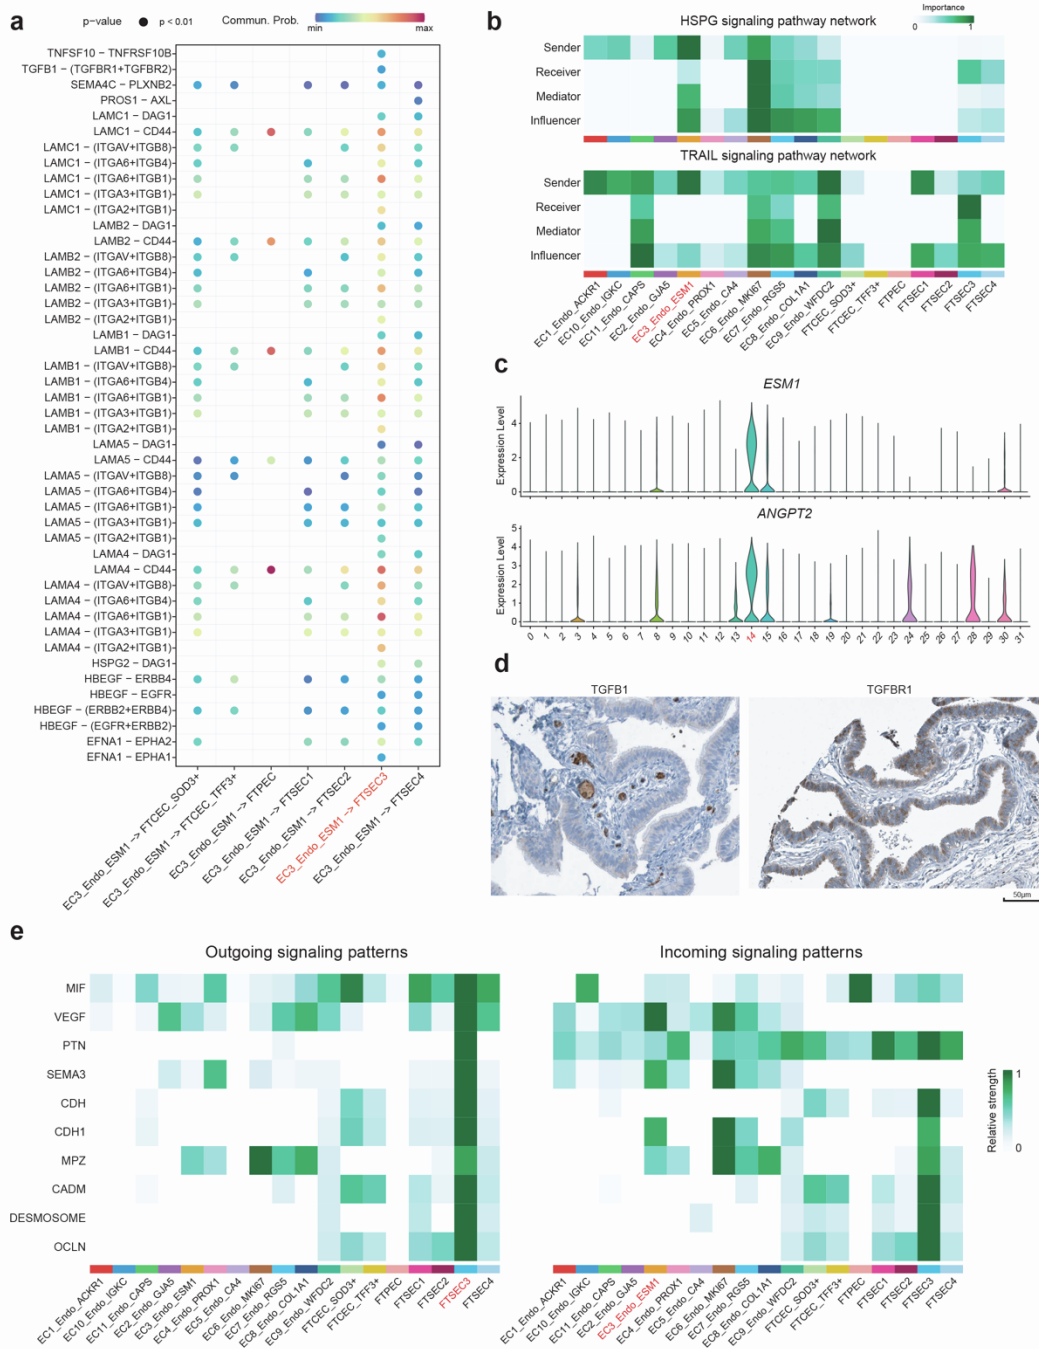

**Figure S5. Extended ligand-receptor analysis, related to Figure 5**

**a.** EC3\_Endo\_ESM1 output signal pathway ligand receptor cell communication probability from EC3\_Endo\_ESM1 to epithelial cell sub cluster. **b.** The signaling role of each epithelial and endothelial cell cluster in HSPG (top) and TRAIL (bottom) signaling pathway network. **c.** The violin diagram shows the *ESM1* and *ANGPT2* expression in different pan-cancer endothelial cells. **d.** Expression of *TGFB1* and *TGFBR1* proteins in fallopian tubes. Image from The Human Protein Atlas. **e.** FTSEC3 output signal pathway intensity. Left side indicates outgoing signaling patterns, right side represents incoming signaling patterns. Color represents relative cell communication strength, with darker colors indicating greater intensity.

**Table S1** Collected patients single cell RNA sequencing metadata.

| Patient id | Stage       | Tissue                | Gender | Age   | genotype  | histological type | Inclusion criteria                                                                                               | hospital                                | Source                                                                                                                                                                  |
|------------|-------------|-----------------------|--------|-------|-----------|-------------------|------------------------------------------------------------------------------------------------------------------|-----------------------------------------|-------------------------------------------------------------------------------------------------------------------------------------------------------------------------|
| P1         | Cancer-free | Normal Fallopian tube | Female | 47    | Absence   | normal            | surgery sample                                                                                                   | Cedars-Sinai Medical Center             | Single-cell transcriptomics identifies gene expression networks driving differentiation and tumorigenesis in the human fallopian tube                                   |
| P2         | Cancer-free | Normal Fallopian tube | Female | 35    | Absence   | normal            | surgery sample                                                                                                   | Cedars-Sinai Medical Center             | Single-cell transcriptomics identifies gene expression networks driving differentiation and tumorigenesis in the human fallopian tube                                   |
| P3         | Cancer-free | Normal Fallopian tube | Female | 47    | Absence   | normal            | surgery sample                                                                                                   | Cedars-Sinai Medical Center             | Single-cell transcriptomics identifies gene expression networks driving differentiation and tumorigenesis in the human fallopian tube                                   |
| P4         | Cancer-free | Normal Fallopian tube | Female | 41    | Absence   | normal            | surgery sample                                                                                                   | Cedars-Sinai Medical Center             | Single-cell transcriptomics identifies gene expression networks driving differentiation and tumorigenesis in the human fallopian tube                                   |
| P5         | Cancer-free | Normal Fallopian tube | Female | 33    | Absence   | normal            | surgery sample                                                                                                   | Cedars-Sinai Medical Center             | Single-cell transcriptomics identifies gene expression networks driving differentiation and tumorigenesis in the human fallopian tube                                   |
| P5         | Cancer-free | Normal Fallopian tube | Female | 33    | Absence   | normal            | surgery sample                                                                                                   | Cedars-Sinai Medical Center             | Single-cell transcriptomics identifies gene expression networks driving differentiation and tumorigenesis in the human fallopian tube                                   |
| P6         | Cancer-free | Normal Fallopian tube | Female | 31    | Absence   | normal            | surgery sample                                                                                                   | Cedars-Sinai Medical Center             | Single-cell transcriptomics identifies gene expression networks driving differentiation and tumorigenesis in the human fallopian tube                                   |
| P6         | Cancer-free | Normal Fallopian tube | Female | 31    | Absence   | normal            | surgery sample                                                                                                   | Cedars-Sinai Medical Center             | Single-cell transcriptomics identifies gene expression networks driving differentiation and tumorigenesis in the human fallopian tube                                   |
| P6         | Cancer-free | Normal Fallopian tube | Female | 31    | Absence   | normal            | surgery sample                                                                                                   | Cedars-Sinai Medical Center             | Single-cell transcriptomics identifies gene expression networks driving differentiation and tumorigenesis in the human fallopian tube                                   |
| P7         | Cancer-free | Normal Fallopian tube | Female | 46    | Absence   | normal            | surgery sample                                                                                                   | Cedars-Sinai Medical Center             | Single-cell transcriptomics identifies gene expression networks driving differentiation and tumorigenesis in the human fallopian tube                                   |
| P7         | Cancer-free | Normal Fallopian tube | Female | 46    | Absence   | normal            | surgery sample                                                                                                   | Cedars-Sinai Medical Center             | Single-cell transcriptomics identifies gene expression networks driving differentiation and tumorigenesis in the human fallopian tube                                   |
| P8         | Cancer-free | Normal Fallopian tube | Female | 62    | Absence   | normal            | surgery sample                                                                                                   | Cedars-Sinai Medical Center             | Single-cell transcriptomics identifies gene expression networks driving differentiation and tumorigenesis in the human fallopian tube                                   |
| P9         | IIIC        | Omentum               | Female | 70-75 | WT        | HGSOC             | surgery sample                                                                                                   | University Hospital Leuven              | A pan-cancer blueprint of the heterogeneous tumor microenvironment revealed by single-cell profiling                                                                    |
| P9         | IIIC        | Normal Omentum        | Female | 70-75 | WT        | HGSOC             | surgery sample                                                                                                   | University Hospital Leuven              | A pan-cancer blueprint of the heterogeneous tumor microenvironment revealed by single-cell profiling                                                                    |
| P9         | IIIC        | Peritoneum            | Female | 70-75 | WT        | HGSOC             | surgery sample                                                                                                   | University Hospital Leuven              | A pan-cancer blueprint of the heterogeneous tumor microenvironment revealed by single-cell profiling                                                                    |
| P9         | IIIC        | Peritoneum            | Female | 70-75 | WT        | HGSOC             | surgery sample                                                                                                   | University Hospital Leuven              | A pan-cancer blueprint of the heterogeneous tumor microenvironment revealed by single-cell profiling                                                                    |
| P9         | IIIC        | Ovaryum               | Female | 70-75 | WT        | HGSOC             | surgery sample                                                                                                   | University Hospital Leuven              | A pan-cancer blueprint of the heterogeneous tumor microenvironment revealed by single-cell profiling                                                                    |
| P10        | IVB         | Peritoneum            | Female | 50-55 | WT        | HGSOC             | surgery sample                                                                                                   | University Hospital Leuven              | A pan-cancer blueprint of the heterogeneous tumor microenvironment revealed by single-cell profiling                                                                    |
| P11        | IVB         | Peritoneum            | Female | 60-65 | BRCA+     | HGSOC             | surgery sample                                                                                                   | University Hospital Leuven              | A pan-cancer blueprint of the heterogeneous tumor microenvironment revealed by single-cell profiling                                                                    |
| P12        | IVB         | Peritoneum            | Female | 80-85 | WT        | HGSOC+CCC         | surgery sample                                                                                                   | University Hospital Leuven              | A pan-cancer blueprint of the heterogeneous tumor microenvironment revealed by single-cell profiling                                                                    |
| P13        | IA          | Ovaryum               | Female | 60-65 | WT        | HGSOC             | surgery sample                                                                                                   | University Hospital Leuven              | A pan-cancer blueprint of the heterogeneous tumor microenvironment revealed by single-cell profiling                                                                    |
| P13        | IA          | Normal Ovaryum        | Female | 60-65 | WT        | HGSOC             | surgery sample                                                                                                   | University Hospital Leuven              | A pan-cancer blueprint of the heterogeneous tumor microenvironment revealed by single-cell profiling                                                                    |
| P14        | Cancer-free | Normal Ovaryum        | Female | 55    | Absence   | normal            | unilateral salpingo-oophorectomy or BSO, respectively and/or hysterectomy because of benign gynecologic diseases | Women's Hospital of Zhejiang University | Single-Cell RNA Sequencing Reveals the Tissue Architecture in Human High-Grade Serous Ovarian Cancer                                                                    |
| P15        | Cancer-free | Normal Ovaryum        | Female | 47    | Absence   | normal            | unilateral salpingo-oophorectomy or BSO, respectively and/or hysterectomy because of benign gynecologic diseases | Women's Hospital of Zhejiang University | Single-Cell RNA Sequencing Reveals the Tissue Architecture in Human High-Grade Serous Ovarian Cancer                                                                    |
| P16        | Cancer-free | Normal Ovaryum        | Female | 46    | Absence   | normal            | unilateral salpingo-oophorectomy or BSO, respectively and/or hysterectomy because of benign gynecologic diseases | Women's Hospital of Zhejiang University | Single-Cell RNA Sequencing Reveals the Tissue Architecture in Human High-Grade Serous Ovarian Cancer                                                                    |
| P17        | Cancer-free | Normal Ovaryum        | Female | 51    | Absence   | normal            | unilateral salpingo-oophorectomy or BSO, respectively and/or hysterectomy because of benign gynecologic diseases | Women's Hospital of Zhejiang University | Single-Cell RNA Sequencing Reveals the Tissue Architecture in Human High-Grade Serous Ovarian Cancer                                                                    |
| P18        | Cancer-free | Normal Ovaryum        | Female | 49    | Absence   | normal            | unilateral salpingo-oophorectomy or BSO, respectively and/or hysterectomy because of benign gynecologic diseases | Women's Hospital of Zhejiang University | Single-Cell RNA Sequencing Reveals the Tissue Architecture in Human High-Grade Serous Ovarian Cancer                                                                    |
| P19        | IIIB        | Ovaryum               | Female | 50    | BRCA2+    | HGSOC             | (BSO)hysterectomy + comprehensive staging or debulking                                                           | Women's Hospital of Zhejiang University | Single-Cell RNA Sequencing Reveals the Tissue Architecture in Human High-Grade Serous Ovarian Cancer                                                                    |
| P20        | IIB         | Ovaryum               | Female | 51    | ATM/BRIP1 | HGSOC             | bilateral salpingo-oophorectomy (BSO)hysterectomy + comprehensive staging or debulking                           | Women's Hospital of Zhejiang University | Single-Cell RNA Sequencing Reveals the Tissue Architecture in Human High-Grade Serous Ovarian Cancer                                                                    |
| P21        | IC2         | Ovaryum               | Female | 41    | WT        | HGSOC             | bilateral salpingo-oophorectomy (BSO)hysterectomy + comprehensive staging or debulking                           | Women's Hospital of Zhejiang University | Single-Cell RNA Sequencing Reveals the Tissue Architecture in Human High-Grade Serous Ovarian Cancer                                                                    |
| P22        | IC2         | Ovaryum               | Female | 47    | WT        | HGSOC             | bilateral salpingo-oophorectomy (BSO)hysterectomy + comprehensive staging or debulking                           | Women's Hospital of Zhejiang University | Single-Cell RNA Sequencing Reveals the Tissue Architecture in Human High-Grade Serous Ovarian Cancer                                                                    |
| P23        | IIB         | Ovaryum               | Female | 57    | BRCA1+    | HGSOC             | bilateral salpingo-oophorectomy (BSO)hysterectomy + comprehensive staging or debulking                           | Women's Hospital of Zhejiang University | Single-Cell RNA Sequencing Reveals the Tissue Architecture in Human High-Grade Serous Ovarian Cancer                                                                    |
| P24        | IIIC        | Ovaryum               | Female | 48    | WT        | HGSOC             | bilateral salpingo-oophorectomy (BSO)hysterectomy + comprehensive staging or debulking                           | Women's Hospital of Zhejiang University | Single-Cell RNA Sequencing Reveals the Tissue Architecture in Human High-Grade Serous Ovarian Cancer                                                                    |
| P25        | IC2         | Ovaryum               | Female | 53    | WT        | HGSOC             | bilateral salpingo-oophorectomy (BSO)hysterectomy + comprehensive staging or debulking                           | Women's Hospital of Zhejiang University | Single-Cell RNA Sequencing Reveals the Tissue Architecture in Human High-Grade Serous Ovarian Cancer                                                                    |
| P26        | IIIC        | Omentum               | Female | 70-79 | WT        | HGSOC             | pathologist experienced in gynaecological pathology (ASVR) and confirmed to be HGSTOC                            | University Hospitals Leuven             | High-grade serous tubo-ovarian cancer refined with single-cell RNA sequencing: specific cell subtypes influence survival and determine molecular subtype classification |
| P26        | IIIC        | Peritoneum            | Female | 70-79 | WT        | HGSOC             | pathologist experienced in gynaecological pathology (ASVR) and confirmed to be HGSTOC                            | University Hospitals Leuven             | High-grade serous tubo-ovarian cancer refined with single-cell RNA sequencing: specific cell subtypes influence survival and determine molecular subtype classification |



|     |         |            |        |         |           |                                                                                                                                                                       |                                                           |                                                                                                                                                                         |                                                                                                                                   |
|-----|---------|------------|--------|---------|-----------|-----------------------------------------------------------------------------------------------------------------------------------------------------------------------|-----------------------------------------------------------|-------------------------------------------------------------------------------------------------------------------------------------------------------------------------|-----------------------------------------------------------------------------------------------------------------------------------|
| P26 | IIIC    | Ovarium    | Female | WT      | HGSOC     | pathologist experienced in gynaecological pathology (ASVR) and confirmed to be HGSTOC                                                                                 | University Hospitals Leuven                               | High-grade serous tubo-ovarian cancer refined with single-cell RNA sequencing; specific cell subtypes influence survival and determine molecular subtype classification |                                                                                                                                   |
|     |         |            | 70-79  |         |           |                                                                                                                                                                       |                                                           |                                                                                                                                                                         |                                                                                                                                   |
| P27 | IVB     | Peritoneum | Female | BRCA1+  | HGSOC     | pathologist experienced in gynaecological pathology (ASVR) and confirmed to be HGSTOC                                                                                 | University Hospitals Leuven                               | High-grade serous tubo-ovarian cancer refined with single-cell RNA sequencing; specific cell subtypes influence survival and determine molecular subtype classification |                                                                                                                                   |
|     |         |            | 60-69  |         |           |                                                                                                                                                                       |                                                           |                                                                                                                                                                         |                                                                                                                                   |
| P28 | IVB     | Peritoneum | Female | WT      | HGSOC+CCC | pathologist experienced in gynaecological pathology (ASVR) and confirmed mixed ovarian epithelial carcinoma consisting of clear cell and high-grade serous components | University Hospitals Leuven                               | High-grade serous tubo-ovarian cancer refined with single-cell RNA sequencing; specific cell subtypes influence survival and determine molecular subtype classification |                                                                                                                                   |
|     |         |            | 80-89  |         |           |                                                                                                                                                                       |                                                           |                                                                                                                                                                         |                                                                                                                                   |
| P29 | IC1     | Ovarium    | Female | WT      | HGSOC     | pathologist experienced in gynaecological pathology (ASVR) and confirmed to be HGSTOC                                                                                 | University Hospitals Leuven                               | High-grade serous tubo-ovarian cancer refined with single-cell RNA sequencing; specific cell subtypes influence survival and determine molecular subtype classification |                                                                                                                                   |
|     |         |            | 60-69  |         |           |                                                                                                                                                                       |                                                           |                                                                                                                                                                         |                                                                                                                                   |
| P30 | IVB     | Peritoneum | Female | WT      | HGSOC     | pathologist experienced in gynaecological pathology (ASVR) and confirmed to be HGSTOC                                                                                 | University Hospitals Leuven                               | High-grade serous tubo-ovarian cancer refined with single-cell RNA sequencing; specific cell subtypes influence survival and determine molecular subtype classification |                                                                                                                                   |
|     |         |            | 80-89  |         |           |                                                                                                                                                                       |                                                           |                                                                                                                                                                         |                                                                                                                                   |
| P31 | IIIC    | Peritoneum | Female | WT      | HGSOC     | pathologist experienced in gynaecological pathology (ASVR) and confirmed to be HGSTOC                                                                                 | University Hospitals Leuven                               | High-grade serous tubo-ovarian cancer refined with single-cell RNA sequencing; specific cell subtypes influence survival and determine molecular subtype classification |                                                                                                                                   |
|     |         |            | 70-79  |         |           |                                                                                                                                                                       |                                                           |                                                                                                                                                                         |                                                                                                                                   |
| P32 | IVB     | Peritoneum | Female | WT      | HGSOC     | pathologist experienced in gynaecological pathology (ASVR) and confirmed to be HGSTOC                                                                                 | University Hospitals Leuven                               | High-grade serous tubo-ovarian cancer refined with single-cell RNA sequencing; specific cell subtypes influence survival and determine molecular subtype classification |                                                                                                                                   |
|     |         |            | 60-69  |         |           |                                                                                                                                                                       |                                                           |                                                                                                                                                                         |                                                                                                                                   |
| P33 | 3C      | Ovarium    | Female | 74      | Absence   | HGSOC                                                                                                                                                                 | surgery sample                                            | Tumor Tissue Repository (BC Cancer, Victoria, BC)                                                                                                                       | Single-cell Profiles and Prognostic Impact of Tumor-Infiltrating Lymphocytes Coexpressing CD39, CD103, and PD-1 in Ovarian Cancer |
| P34 | 3C      | Ovarium    | Female | 54      | Absence   | HGSOC                                                                                                                                                                 | surgery sample                                            | Tumor Tissue Repository (BC Cancer, Victoria, BC)                                                                                                                       | Single-cell Profiles and Prognostic Impact of Tumor-Infiltrating Lymphocytes Coexpressing CD39, CD103, and PD-1 in Ovarian Cancer |
| P35 | 3C      | Ovarium    | Female | 68      | Absence   | HGSOC                                                                                                                                                                 | surgery sample                                            | Tumor Tissue Repository (BC Cancer, Victoria, BC)                                                                                                                       | Single-cell Profiles and Prognostic Impact of Tumor-Infiltrating Lymphocytes Coexpressing CD39, CD103, and PD-1 in Ovarian Cancer |
| P36 | 3C      | Ovarium    | Female | 68      | Absence   | HGSOC                                                                                                                                                                 | surgery sample                                            | Tumor Tissue Repository (BC Cancer, Victoria, BC)                                                                                                                       | Single-cell Profiles and Prognostic Impact of Tumor-Infiltrating Lymphocytes Coexpressing CD39, CD103, and PD-1 in Ovarian Cancer |
| P37 | 3C      | Ovarium    | Female | 70      | Absence   | HGSOC                                                                                                                                                                 | surgery sample                                            | Tumor Tissue Repository (BC Cancer, Victoria, BC)                                                                                                                       | Single-cell Profiles and Prognostic Impact of Tumor-Infiltrating Lymphocytes Coexpressing CD39, CD103, and PD-1 in Ovarian Cancer |
| P38 | 3C      | Ovarium    | Female | 66      | Absence   | HGSOC                                                                                                                                                                 | surgery sample                                            | Tumor Tissue Repository (BC Cancer, Victoria, BC)                                                                                                                       | Single-cell Profiles and Prognostic Impact of Tumor-Infiltrating Lymphocytes Coexpressing CD39, CD103, and PD-1 in Ovarian Cancer |
| P39 | Absence | Omentum    | Female | Absence | Absence   | HGSOC                                                                                                                                                                 | surgery sample of primary debulking surgery               | Brigham and Women's Hospital (BWH) and Dana-Farber Cancer Institute (DFCI)                                                                                              | Enhanced efficacy of simultaneous PD-1 and PD-L1 immune checkpoint blockade in high grade serous ovarian cancer                   |
| P40 | Absence | Ovarium    | Female | Absence | Absence   | HGSOC                                                                                                                                                                 | surgery sample                                            | Dartmouth-Hitchcock Medical Center                                                                                                                                      | Ovarian cancer immunogenicity is governed by a narrow subset of progenitor tissue-resident memory T cells                         |
| P41 | Absence | Ovarium    | Female | Absence | Absence   | HGSOC                                                                                                                                                                 | surgery sample                                            | Dartmouth-Hitchcock Medical Center                                                                                                                                      | Ovarian cancer immunogenicity is governed by a narrow subset of progenitor tissue-resident memory T cells                         |
| P42 | Absence | Ovarium    | Female | Absence | Absence   | HGSOC                                                                                                                                                                 | surgery sample                                            | Dartmouth-Hitchcock Medical Center                                                                                                                                      | Ovarian cancer immunogenicity is governed by a narrow subset of progenitor tissue-resident memory T cells                         |
| P43 | Absence | Ovarium    | Female | Absence | Absence   | HGSOC                                                                                                                                                                 | surgery sample                                            | Dartmouth-Hitchcock Medical Center                                                                                                                                      | Ovarian cancer immunogenicity is governed by a narrow subset of progenitor tissue-resident memory T cells                         |
| P44 | Absence | Ovarium    | Female | Absence | Absence   | HGSOC                                                                                                                                                                 | surgery sample                                            | Dartmouth-Hitchcock Medical Center                                                                                                                                      | Ovarian cancer immunogenicity is governed by a narrow subset of progenitor tissue-resident memory T cells                         |
| P45 | Absence | Ovarium    | Female | Absence | Absence   | HGSOC                                                                                                                                                                 | surgery sample                                            | Dartmouth-Hitchcock Medical Center                                                                                                                                      | Ovarian cancer immunogenicity is governed by a narrow subset of progenitor tissue-resident memory T cells                         |
| P46 | Absence | Ovarium    | Female | Absence | Absence   | HGSOC                                                                                                                                                                 | surgery sample                                            | Dartmouth-Hitchcock Medical Center                                                                                                                                      | Ovarian cancer immunogenicity is governed by a narrow subset of progenitor tissue-resident memory T cells                         |
| P47 | Absence | Ovarium    | Female | Absence | Absence   | HGSOC                                                                                                                                                                 | surgery sample                                            | Dartmouth-Hitchcock Medical Center                                                                                                                                      | Ovarian cancer immunogenicity is governed by a narrow subset of progenitor tissue-resident memory T cells                         |
| P48 | Absence | Ovarium    | Female | Absence | Absence   | HGSOC                                                                                                                                                                 | surgery sample                                            | Dartmouth-Hitchcock Medical Center                                                                                                                                      | Ovarian cancer immunogenicity is governed by a narrow subset of progenitor tissue-resident memory T cells                         |
| P49 | Absence | Ovarium    | Female | Absence | Absence   | Absence                                                                                                                                                               | surgery sample                                            | Brigham and Women's Hospital                                                                                                                                            | A single-cell and single-nucleus RNA-Seq toolbox for fresh and frozen human tumors                                                |
| P50 | Absence | Ovarium    | Female | Absence | Absence   | Absence                                                                                                                                                               | surgery sample                                            | Brigham and Women's Hospital                                                                                                                                            | A single-cell and single-nucleus RNA-Seq toolbox for fresh and frozen human tumors                                                |
| P51 | Absence | Ascites    | Female | Absence | Absence   | Absence                                                                                                                                                               | surgery sample                                            | Brigham and Women's Hospital                                                                                                                                            | A single-cell and single-nucleus RNA-Seq toolbox for fresh and frozen human tumors                                                |
| P52 | IIB     | Ovarium    | Female | 61      | Absence   | HGSOC                                                                                                                                                                 | surgery sample                                            | Brigham and Women's Hospital                                                                                                                                            | A multi-omic single-cell landscape of human gynecologic malignancies                                                              |
| P53 | IIIC    | Ovarium    | Female | 59      | Absence   | HGSOC                                                                                                                                                                 | surgery sample                                            | Brigham and Women's Hospital                                                                                                                                            | A multi-omic single-cell landscape of human gynecologic malignancies                                                              |
| P54 | IIIC    | Peritoneum | Female | 68      | Absence   | HGSOC                                                                                                                                                                 | Prospective HGSOC tumor specimens were collected from IDS | Hospital District of Southwest Finland                                                                                                                                  | Longitudinal single-cell RNA-seq analysis reveals stress-promoted chemoresistance in metastatic ovarian cancer                    |
| P55 | IVA     | Omentum    | Female | 54      | Absence   | HGSOC                                                                                                                                                                 | Prospective HGSOC tumor specimens were collected from IDS | Hospital District of Southwest Finland                                                                                                                                  | Longitudinal single-cell RNA-seq analysis reveals stress-promoted chemoresistance in metastatic ovarian cancer                    |
| P56 | IIIC    | Omentum    | Female | 62      | Absence   | HGSOC                                                                                                                                                                 | Prospective HGSOC tumor specimens were collected from IDS | Hospital District of Southwest Finland                                                                                                                                  | Longitudinal single-cell RNA-seq analysis reveals stress-promoted chemoresistance in metastatic ovarian cancer                    |
| P57 | IVA     | Omentum    | Female | 67      | Absence   | HGSOC                                                                                                                                                                 | Prospective HGSOC tumor specimens were collected from IDS | Hospital District of Southwest Finland                                                                                                                                  | Longitudinal single-cell RNA-seq analysis reveals stress-promoted chemoresistance in metastatic ovarian cancer                    |
| P57 | IVA     | Peritoneum | Female | 67      | Absence   | HGSOC                                                                                                                                                                 | Prospective HGSOC tumor specimens were collected from IDS | Hospital District of Southwest Finland                                                                                                                                  | Longitudinal single-cell RNA-seq analysis reveals stress-promoted chemoresistance in metastatic ovarian cancer                    |
| P58 | IIIC    | Omentum    | Female | 62      | Absence   | HGSOC                                                                                                                                                                 | Prospective HGSOC tumor specimens were collected from IDS | Hospital District of Southwest Finland                                                                                                                                  | Longitudinal single-cell RNA-seq analysis reveals stress-promoted chemoresistance in metastatic ovarian cancer                    |
| P58 | IIIC    | Peritoneum | Female | 62      | Absence   | HGSOC                                                                                                                                                                 | Prospective HGSOC tumor specimens were collected from IDS | Hospital District of Southwest Finland                                                                                                                                  | Longitudinal single-cell RNA-seq analysis reveals stress-promoted chemoresistance in metastatic ovarian cancer                    |
| P59 | IVA     | Omentum    | Female | 64      | Absence   | HGSOC                                                                                                                                                                 | Prospective HGSOC tumor specimens were collected from IDS | Hospital District of Southwest Finland                                                                                                                                  | Longitudinal single-cell RNA-seq analysis reveals stress-promoted chemoresistance in metastatic ovarian cancer                    |
| P59 | IVA     | Mesentery  | Female | 64      | Absence   | HGSOC                                                                                                                                                                 | Prospective HGSOC tumor specimens were collected from IDS | Hospital District of Southwest Finland                                                                                                                                  | Longitudinal single-cell RNA-seq analysis reveals stress-promoted chemoresistance in metastatic ovarian cancer                    |
| P60 | IVA     | Peritoneum | Female | 73      | Absence   | HGSOC                                                                                                                                                                 | Prospective HGSOC tumor specimens were collected from IDS | Hospital District of Southwest Finland                                                                                                                                  | Longitudinal single-cell RNA-seq analysis reveals stress-promoted chemoresistance in metastatic ovarian cancer                    |
| P60 | IVA     | Ovarium    | Female | 73      | Absence   | HGSOC                                                                                                                                                                 | Prospective HGSOC tumor specimens were collected from IDS | Hospital District of Southwest Finland                                                                                                                                  | Longitudinal single-cell RNA-seq analysis reveals stress-promoted chemoresistance in metastatic ovarian cancer                    |
| P61 | IVA     | Peritoneum | Female | 72      | Absence   | HGSOC                                                                                                                                                                 | Prospective HGSOC tumor specimens were collected from IDS | Hospital District of Southwest Finland                                                                                                                                  | Longitudinal single-cell RNA-seq analysis reveals stress-promoted chemoresistance in metastatic ovarian cancer                    |
| P61 | IVA     | Omentum    | Female | 72      | Absence   | HGSOC                                                                                                                                                                 | Prospective HGSOC tumor specimens were collected from IDS | Hospital District of Southwest Finland                                                                                                                                  | Longitudinal single-cell RNA-seq analysis reveals stress-promoted chemoresistance in metastatic ovarian cancer                    |
| P62 | IVA     | Omentum    | Female | 78      | Absence   | HGSOC                                                                                                                                                                 | Prospective HGSOC tumor specimens were collected from IDS | Hospital District of Southwest Finland                                                                                                                                  | Longitudinal single-cell RNA-seq analysis reveals stress-promoted chemoresistance in metastatic ovarian cancer                    |
| P63 | IVB     | Omentum    | Female | 67      | Absence   | HGSOC                                                                                                                                                                 | Prospective HGSOC tumor specimens were collected from IDS | Hospital District of Southwest Finland                                                                                                                                  | Longitudinal single-cell RNA-seq analysis reveals stress-promoted chemoresistance in metastatic ovarian cancer                    |
| P63 | IVB     | Peritoneum | Female | 67      | Absence   | HGSOC                                                                                                                                                                 | Prospective HGSOC tumor specimens were collected from IDS | Hospital District of Southwest Finland                                                                                                                                  | Longitudinal single-cell RNA-seq analysis reveals stress-promoted chemoresistance in metastatic ovarian cancer                    |
| P64 | IVA     | Omentum    | Female | 74      | Absence   | HGSOC                                                                                                                                                                 | Prospective HGSOC tumor specimens were collected from IDS | Hospital District of Southwest Finland                                                                                                                                  | Longitudinal single-cell RNA-seq analysis reveals stress-promoted chemoresistance in metastatic ovarian cancer                    |

|     |         |                       |        |         |         |              |                                                         |                                                                             |                                                                                                                                         |
|-----|---------|-----------------------|--------|---------|---------|--------------|---------------------------------------------------------|-----------------------------------------------------------------------------|-----------------------------------------------------------------------------------------------------------------------------------------|
| P65 | Healthy | Normal Fallopian tube | Female | 52      | Absence | normal       | surgery sample of female subjects of premenopausal ages | University of Michigan                                                      | Cellular heterogeneity of human fallopian tubes in normal and hydrosalpinx disease states identified using scRNA-seq                    |
| P66 | Healthy | Normal Fallopian tube | Female | 30      | Absence | normal       | surgery sample of female subjects of premenopausal ages | University of Michigan                                                      | Cellular heterogeneity of human fallopian tubes in normal and hydrosalpinx disease states identified using scRNA-seq                    |
| P67 | Healthy | Normal Fallopian tube | Female | 46      | Absence | normal       | surgery sample of female subjects of premenopausal ages | University of Michigan                                                      | Cellular heterogeneity of human fallopian tubes in normal and hydrosalpinx disease states identified using scRNA-seq                    |
| P68 | Healthy | Normal Fallopian tube | Female | 31      | Absence | normal       | surgery sample of female subjects of premenopausal ages | University of Michigan                                                      | Cellular heterogeneity of human fallopian tubes in normal and hydrosalpinx disease states identified using scRNA-seq                    |
| P69 | IV      | Ovary                 | Female | Absence | Absence | HGSOC        | surgery sample                                          | University of Minnesota                                                     | Multiomic Analysis of Subtype Evolution and Heterogeneity in High-Grade Serous Ovarian Carcinoma                                        |
| P70 | IIIC    | Ovary                 | Female | Absence | Absence | HGSOC        | surgery sample                                          | University of Minnesota                                                     | Multiomic Analysis of Subtype Evolution and Heterogeneity in High-Grade Serous Ovarian Carcinoma                                        |
| P71 | IVB     | Ovary                 | Female | Absence | Absence | HGSOC        | surgery sample                                          | University of Minnesota                                                     | Multiomic Analysis of Subtype Evolution and Heterogeneity in High-Grade Serous Ovarian Carcinoma                                        |
| P72 | IV      | Ovary                 | Female | Absence | Absence | HGSOC        | surgery sample                                          | University of Minnesota                                                     | Multiomic Analysis of Subtype Evolution and Heterogeneity in High-Grade Serous Ovarian Carcinoma                                        |
| P73 | IVA     | Ovary                 | Female | Absence | Absence | HGSOC        | surgery sample                                          | University of Minnesota                                                     | Multiomic Analysis of Subtype Evolution and Heterogeneity in High-Grade Serous Ovarian Carcinoma                                        |
| P74 | Absence | Ovary                 | Female | Absence | Absence | HGSOC        | surgery sample of untreated primary tumors              | West China Second Hospital, Sichuan University                              | Identification of the immune subtype of ovarian cancer patients by integrated analyses of transcriptome and single-cell sequencing data |
| P75 | Absence | Ovary                 | Female | Absence | Absence | HGSOC        | surgery sample of untreated primary tumors              | West China Second Hospital, Sichuan University                              | Identification of the immune subtype of ovarian cancer patients by integrated analyses of transcriptome and single-cell sequencing data |
| P76 | Absence | Ovary                 | Female | Absence | Absence | HGSOC        | surgery sample of untreated primary tumors              | West China Second Hospital, Sichuan University                              | Identification of the immune subtype of ovarian cancer patients by integrated analyses of transcriptome and single-cell sequencing data |
| P77 | Absence | Ovary                 | Female | Absence | Absence | Endometrioid | surgery sample of untreated primary tumors              | West China Second Hospital, Sichuan University                              | Identification of the immune subtype of ovarian cancer patients by integrated analyses of transcriptome and single-cell sequencing data |
| P78 | Absence | Peritoneum            | Female | Absence | Absence | HGSOC        | surgery sample of untreated primary tumors              | West China Second Hospital, Sichuan University                              | Identification of the immune subtype of ovarian cancer patients by integrated analyses of transcriptome and single-cell sequencing data |
| P79 | Absence | Peritoneum            | Female | Absence | Absence | LGSOC        | surgery sample of untreated primary tumors              | West China Second Hospital, Sichuan University                              | Identification of the immune subtype of ovarian cancer patients by integrated analyses of transcriptome and single-cell sequencing data |
| P80 | Absence | Relapse tumors        | Female | Absence | Absence | HGSOC        | surgery sample of untreated primary tumors              | West China Second Hospital, Sichuan University                              | Identification of the immune subtype of ovarian cancer patients by integrated analyses of transcriptome and single-cell sequencing data |
| P81 | Absence | Relapse tumors        | Female | Absence | Absence | LGSOC        | surgery sample of untreated primary tumors              | West China Second Hospital, Sichuan University                              | Identification of the immune subtype of ovarian cancer patients by integrated analyses of transcriptome and single-cell sequencing data |
| P82 | Absence | Ovary                 | Female | Absence | Absence | Absence      | surgery sample                                          | Huntsman Cancer Institute, Utah, USA and at University of Helsinki, Finland | miQC: An adaptive probabilistic framework for quality control of single-cell RNA-sequencing data                                        |
| P83 | Absence | Ovary                 | Female | Absence | Absence | Absence      | surgery sample                                          | Huntsman Cancer Institute, Utah, USA and at University of Helsinki, Finland | miQC: An adaptive probabilistic framework for quality control of single-cell RNA-sequencing data                                        |
| P84 | Absence | Ovary                 | Female | Absence | Absence | Absence      | surgery sample                                          | Huntsman Cancer Institute, Utah, USA and at University of Helsinki, Finland | miQC: An adaptive probabilistic framework for quality control of single-cell RNA-sequencing data                                        |

Note: Partial public data pathology information is missing and marked as "Absence". The Inclusion criteria information not explicitly mentioned in the original text is labeled as "surgery sample".

**Table S2** **GSVA enrichment result of cancerSEA gene set of module 1 and module3.**

|                 | <b>module 1</b> | <b>module 3</b> |
|-----------------|-----------------|-----------------|
| Angiogenesis    | 0.418283882     | 0.503452342     |
| Apoptosis       | 0.271375825     | 0.529839799     |
| Cell Cycle      | 0.578523842     | 0.308534688     |
| Differentiation | 0.3233917       | 0.518811206     |
| DNA damage      | 0.294293984     | 0.508519042     |
| DNA repair      | 0.389440533     | 0.417034406     |
| EMT             | 0.493920241     | 0.339786825     |
| Hypoxia         | 0.379962105     | 0.536818506     |
| Inflammation    | -0.326905687    | 0.696088588     |
| Invasion        | 0.527789624     | 0.305854316     |
| Metastasis      | 0.323202576     | 0.53659832      |
| Proliferation   | 0.364169971     | 0.440038584     |
| Quiescence      | -0.245442436    | 0.685674871     |
| Stemness        | 0.389320043     | 0.433264862     |

**Table S3 GO Enrichment result of pseudo-time variable gene clusters.**

| Category                | CategoryID | GO         | Description                                                         | PARENT_GO                                               | LogP | Enrichment | Zscore | X.Total GeneLibrary | X.Gene InGO | X.Gen ElnHit List | X.GeneInGOAndHitList | X.In GO | STDV.In GO | GeneID                                                                                                                                             | Hits                                                                                                                                                                                                                                                                                                                                                                                                                                                                                                                                                                                                                                                                                                                                                                                                                                                                  | Log-q-value | GeneList |
|-------------------------|------------|------------|---------------------------------------------------------------------|---------------------------------------------------------|------|------------|--------|---------------------|-------------|-------------------|----------------------|---------|------------|----------------------------------------------------------------------------------------------------------------------------------------------------|-----------------------------------------------------------------------------------------------------------------------------------------------------------------------------------------------------------------------------------------------------------------------------------------------------------------------------------------------------------------------------------------------------------------------------------------------------------------------------------------------------------------------------------------------------------------------------------------------------------------------------------------------------------------------------------------------------------------------------------------------------------------------------------------------------------------------------------------------------------------------|-------------|----------|
| GO Biological Processes | 19         | GO:0003341 | cilium movement                                                     | 19_GO:0009987 cellular process                          | -32  | 37         | 30     | 30304               | 178         | 116               | 25                   | 22      | 3.8        | 17671770870195762579051364533407964580217836595835312387213816214684514848119638520016221967020136221421257062286207545895387885399949             | DNAH5/DNAH9/DNAH11/SPAG6/CFAP45/ZMYND10/SPAG7/CLXN/CFAP43/TEXT1/IRPN1/LDNAA1/PIERCE1/CFAP52/DAW1/DNAH10/SPAG17/ENKUR/CFAP53/RSHP9/CATSPER/CFAP157/RSHP4A/CFAP73/HOATZ                                                                                                                                                                                                                                                                                                                                                                                                                                                                                                                                                                                                                                                                                                 | -27         | cluster1 |
| GO Biological Processes | 19         | GO:0007018 | microtubule-based movement                                          | 19_GO:0009987 cellular process                          | -29  | 20         | 23     | 30304               | 388         | 116               | 29                   | 25      | 4          | 17671770870195762579051364533407964580217836595835312387213816214684514848119638520016220162219670220136221421257062286207343521345895387885399949 | DNAH5/DNAH9/TUBA1/ADNAP1/SPAG6/CFAP45/ZMYND10/SPAG7/CLXN/CFAP43/DYDLR2/TEXT1/IRPN1/LDNAA1/PIERCE1/CFAP52/DAW1/DNAH10/SPAG17/DNAH12/ENKUR/CFAP53/RSHP9/CATSPER/CFAP157/DYDLR4/RSHP4A/CFAP73/HOATZ                                                                                                                                                                                                                                                                                                                                                                                                                                                                                                                                                                                                                                                                      | -25         | cluster1 |
| GO Biological Processes | 19         | GO:0035082 | axoneme assembly                                                    | 19_GO:0009987 cellular process                          | -25  | 49         | 29     | 30304               | 96          | 116               | 18                   | 16      | 3.4        | 17672302957651364796458021785478897659274912387213816216478120016221421286207345895387885399949                                                    | DNAH5/FOXJ1/SPAG6/ZMYND10/CLXN/CFAP43/CCDC65/RSPH1/DRCL/DNAAF1/PIERCE1/DAW1/SPAG17/RSHP9/CFAP157/RSHP4A/CFAP73/HOATZ                                                                                                                                                                                                                                                                                                                                                                                                                                                                                                                                                                                                                                                                                                                                                  | -21         | cluster1 |
| GO Biological Processes | 19         | GO:0001578 | microtubule bundle formation                                        | 19_GO:0009987 cellular process                          | -25  | 40         | 27     | 30304               | 125         | 116               | 19                   | 16      | 3.4        | 1767230295765136451673796458021785478897659274912387213816216478120016221421286207345895387885399949                                               | DNAH5/FOXJ1/SPAG6/ZMYND10/TPPB3/CLXN/CFAP43/CCDC65/RSPH1/DRCL/DNAAF1/PIERCE1/DAW1/SPAG17/RSHP9/CFAP157/RSHP4A/CFAP73/HOATZ                                                                                                                                                                                                                                                                                                                                                                                                                                                                                                                                                                                                                                                                                                                                            | -21         | cluster1 |
| GO Biological Processes | 19         | GO:0044782 | cilium organization                                                 | 19_GO:0009987 cellular process                          | -24  | 18         | 20     | 30304               | 365         | 116               | 25                   | 22      | 3.8        | 17672302957629070513645756279645802178365958547897659274912387212725412834113816216478120016221421257177286207339145345895387885399949             | DNAH5/FOXJ1/SPAG6/CCDC13/ZMYND10/CEP126/CLXN/CFAP43/TEXT1/CCDC65/RSPH1/DRCL/DNAAF1/ERIC1/CI21/DAW1/SPAG17/RSHP9/CFAP126/CFAP157/CFAP157/IBAR2/RSHP4A/CFAP73/HOATZ                                                                                                                                                                                                                                                                                                                                                                                                                                                                                                                                                                                                                                                                                                     | -20         | cluster1 |
| GO Biological Processes | 19         | GO:0001539 | cilium or flagellum-dependent cell motility                         | 19_GO:0009987 cellular process                          | -22  | 34         | 24     | 30304               | 140         | 116               | 18                   | 16      | 3.4        | 1767177087019576257908021783659583538547892749146845196385219670221421257062286207345895399949                                                     | DNAH5/DNAH9/DNAH11/SPAG6/CFAP45/CFAP43/TEXT1/IRPN1/CLXN/CFAP43/CFAP52/DAW1/DNAH10/ENKUR/RSHP9/CATSPER/CFAP157/RSHP4A/HOATZ                                                                                                                                                                                                                                                                                                                                                                                                                                                                                                                                                                                                                                                                                                                                            | -19         | cluster1 |
| GO Biological Processes | 19         | GO:0060285 | cilium-dependent cell motility                                      | 19_GO:0009987 cellular process                          | -22  | 34         | 24     | 30304               | 140         | 116               | 18                   | 16      | 3.4        | 1767177087019576257908021783659583538547892749146845196385219670221421257062286207345895399949                                                     | DNAH5/DNAH9/DNAH11/SPAG6/CFAP45/CFAP43/TEXT1/IRPN1/CLXN/CFAP43/CFAP52/DAW1/DNAH10/ENKUR/RSHP9/CATSPER/CFAP157/RSHP4A/HOATZ                                                                                                                                                                                                                                                                                                                                                                                                                                                                                                                                                                                                                                                                                                                                            | -19         | cluster1 |
| GO Biological Processes | 19         | GO:0060271 | cilium assembly                                                     | 19_GO:0009987 cellular process                          | -22  | 18         | 19     | 30304               | 331         | 116               | 23                   | 20      | 3.5        | 17672302957629070513645756279645802178365958547897659274912387212725413816216478120016221421286207339145345895387885399949                         | DNAH5/FOXJ1/SPAG6/CCDC13/ZMYND10/CEP126/CLXN/CFAP43/TEXT1/CCDC65/RSPH1/DRCL/DNAAF1/ERIC1/DAW1/SPAG17/RSHP9/CFAP157/IBAR2/RSHP4A/CFAP73/HOATZ                                                                                                                                                                                                                                                                                                                                                                                                                                                                                                                                                                                                                                                                                                                          | -19         | cluster1 |
| GO Biological Processes | 19         | GO:0003351 | epithelial cilium movement involved in extracellular fluid movement | 19_GO:0051179 localization                              | -21  | 79         | 32     | 30304               | 43          | 116               | 13                   | 11      | 2.9        | 17671770870195762579053400802178385312387216478120016220136345895                                                                                  | DNAH5/DNAH9/DNAH11/SPAG6/CFAP45/SPA17/CFAP43/IRPN1/LDNAA1/PIERCE1/DAW1/SPAG17/CFAP53/RSHP4A                                                                                                                                                                                                                                                                                                                                                                                                                                                                                                                                                                                                                                                                                                                                                                           | -18         | cluster1 |
| GO Biological Processes | 19         | GO:0006858 | extracellular transport                                             | 19_GO:0051179 localization                              | -21  | 74         | 31     | 30304               | 46          | 116               | 13                   | 11      | 2.9        | 176717708701957625790533400802178385312387216478120016220136345895                                                                                 | DNAH5/DNAH9/DNAH11/SPAG6/CFAP45/SPA17/CFAP43/IRPN1/LDNAA1/PIERCE1/DAW1/SPAG17/CFAP53/RSHP4A                                                                                                                                                                                                                                                                                                                                                                                                                                                                                                                                                                                                                                                                                                                                                                           | -18         | cluster1 |
| GO Biological Processes | 19         | GO:0001568 | blood vessel development                                            | 19_GO:0032502 developmental process                     | -3.8 | 14         | 6.9    | 30304               | 523         | 17                | 4                    | 24      | 10         | 1490270134916347                                                                                                                                   | CN2/GIA/CCN1/CCL2                                                                                                                                                                                                                                                                                                                                                                                                                                                                                                                                                                                                                                                                                                                                                                                                                                                     | -1.9        | cluster2 |
| GO Biological Processes | 19         | GO:0001944 | vasculature development                                             | 19_GO:0032502 developmental process                     | -3.7 | 13         | 6.8    | 30304               | 543         | 17                | 4                    | 24      | 10         | 1490270134916347                                                                                                                                   | CN2/GIA/CCN1/CCL2                                                                                                                                                                                                                                                                                                                                                                                                                                                                                                                                                                                                                                                                                                                                                                                                                                                     | -1.8        | cluster2 |
| GO Biological Processes | 19         | GO:0043408 | regulation of MAPK cascade                                          | 19_GO:0050896 response to stimulus                      | -3.3 | 11         | 6      | 30304               | 673         | 17                | 4                    | 24      | 10         | 1490348734916347                                                                                                                                   | CN2/GIFB4/CCN1/CCL2                                                                                                                                                                                                                                                                                                                                                                                                                                                                                                                                                                                                                                                                                                                                                                                                                                                   | -1.6        | cluster2 |
| GO Biological Processes | 19         | GO:0070372 | regulation of ERK1 and ERK2 cascade                                 | 19_GO:0050896 response to stimulus                      | -3.2 | 17         | 6.8    | 30304               | 313         | 17                | 3                    | 18      | 9.2        | 149034916347                                                                                                                                       | CCN2/CCN1/CCL2                                                                                                                                                                                                                                                                                                                                                                                                                                                                                                                                                                                                                                                                                                                                                                                                                                                        | -1.5        | cluster2 |
| GO Biological Processes | 19         | GO:0001525 | angiogenesis                                                        | 19_GO:0032502 developmental process                     | -3.1 | 16         | 6.5    | 30304               | 336         | 17                | 3                    | 18      | 9.2        | 149034916347                                                                                                                                       | CN2/CCN1/CCL2                                                                                                                                                                                                                                                                                                                                                                                                                                                                                                                                                                                                                                                                                                                                                                                                                                                         | -1.4        | cluster2 |
| GO Biological Processes | 19         | GO:0006935 | chemotaxis                                                          | 19_GO:0040011 locomotion                                | -3.1 | 16         | 6.5    | 30304               | 341         | 17                | 3                    | 18      | 9.2        | 292034916347                                                                                                                                       | CXCL2/CCN1/CCL2                                                                                                                                                                                                                                                                                                                                                                                                                                                                                                                                                                                                                                                                                                                                                                                                                                                       | -1.4        | cluster2 |
| GO Biological Processes | 19         | GO:0042330 | taxis                                                               | 19_GO:0040011 locomotion                                | -3.1 | 16         | 6.4    | 30304               | 343         | 17                | 3                    | 18      | 9.2        | 292034916347                                                                                                                                       | CXCL2/CCN1/CCL2                                                                                                                                                                                                                                                                                                                                                                                                                                                                                                                                                                                                                                                                                                                                                                                                                                                       | -1.4        | cluster2 |
| GO Biological Processes | 19         | GO:0040011 | locomotion                                                          | 19_GO:0040011 locomotion                                | -3   | 15         | 6.2    | 30304               | 362         | 17                | 3                    | 18      | 9.2        | 292034916347                                                                                                                                       | CXCL2/CCN1/CCL2                                                                                                                                                                                                                                                                                                                                                                                                                                                                                                                                                                                                                                                                                                                                                                                                                                                       | -1.4        | cluster2 |
| GO Biological Processes | 19         | GO:0048514 | blood vessel morphogenesis                                          | 19_GO:0032502 developmental process                     | -2.8 | 12         | 5.7    | 30304               | 429         | 17                | 3                    | 18      | 9.2        | 149034916347                                                                                                                                       | CN2/CCN1/CCL2                                                                                                                                                                                                                                                                                                                                                                                                                                                                                                                                                                                                                                                                                                                                                                                                                                                         | -1.2        | cluster2 |
| GO Biological Processes | 19         | GO:0043410 | positive regulation of MAPK cascade                                 | 19_GO:0048518 positive regulation of biological process | -2.7 | 11         | 5.3    | 30304               | 474         | 17                | 3                    | 18      | 9.2        | 149034876347                                                                                                                                       | CN2/GIFB4/CCL2                                                                                                                                                                                                                                                                                                                                                                                                                                                                                                                                                                                                                                                                                                                                                                                                                                                        | -1.1        | cluster2 |
| GO Biological Processes | 19         | GO:0006754 | ATP biosynthetic process                                            | 19_GO:0008152 metabolic process                         | -2.3 | 86         | 34     | 30304               | 84          | 59                | 14                   | 24      | 5.5        | 226498506509513151451615185214715955195561063284833                                                                                                | ALDOA/ATP5F1A/ATP5F1B/ATP5F1C/ATP5F1D/ATP5F1E/ATP5M1/ATP5M2/ATP5M3/ATP5M4/ATP5M5/ATP5M6/ATP5M7/ATP5M8/ATP5M9/ATP5M10/ATP5M11/ATP5M12/ATP5M13/ATP5M14/ATP5M15/ATP5M16/ATP5M17/ATP5M18/ATP5M19/ATP5M20/ATP5M21/ATP5M22/ATP5M23/ATP5M24/ATP5M25/ATP5M26/ATP5M27/ATP5M28/ATP5M29/ATP5M30/ATP5M31/ATP5M32/ATP5M33/ATP5M34/ATP5M35/ATP5M36/ATP5M37/ATP5M38/ATP5M39/ATP5M40/ATP5M41/ATP5M42/ATP5M43/ATP5M44/ATP5M45/ATP5M46/ATP5M47/ATP5M48/ATP5M49/ATP5M50/ATP5M51/ATP5M52/ATP5M53/ATP5M54/ATP5M55/ATP5M56/ATP5M57/ATP5M58/ATP5M59/ATP5M60/ATP5M61/ATP5M62/ATP5M63/ATP5M64/ATP5M65/ATP5M66/ATP5M67/ATP5M68/ATP5M69/ATP5M70/ATP5M71/ATP5M72/ATP5M73/ATP5M74/ATP5M75/ATP5M76/ATP5M77/ATP5M78/ATP5M79/ATP5M80/ATP5M81/ATP5M82/ATP5M83/ATP5M84/ATP5M85/ATP5M86/ATP5M87/ATP5M88/ATP5M89/ATP5M90/ATP5M91/ATP5M92/ATP5M93/ATP5M94/ATP5M95/ATP5M96/ATP5M97/ATP5M98/ATP5M99/ATP5M100 | -20         | cluster3 |
| GO Biological Processes | 19         | GO:0009206 | purine ribonucleoside triphosphate biosynthetic process             | 19_GO:0008152 metabolic process                         | -2.2 | 76         | 32     | 30304               | 95          | 59                | 14                   | 24      | 5.5        | 226498506509513151451615185214715955195561063284833                                                                                                | ALDOA/ATP5F1A/ATP5F1B/ATP5F1C/ATP5F1D/ATP5F1E/ATP5M1/ATP5M2/ATP5M3/ATP5M4/ATP5M5/ATP5M6/ATP5M7/ATP5M8/ATP5M9/ATP5M10/ATP5M11/ATP5M12/ATP5M13/ATP5M14/ATP5M15/ATP5M16/ATP5M17/ATP5M18/ATP5M19/ATP5M20/ATP5M21/ATP5M22/ATP5M23/ATP5M24/ATP5M25/ATP5M26/ATP5M27/ATP5M28/ATP5M29/ATP5M30/ATP5M31/ATP5M32/ATP5M33/ATP5M34/ATP5M35/ATP5M36/ATP5M37/ATP5M38/ATP5M39/ATP5M40/ATP5M41/ATP5M42/ATP5M43/ATP5M44/ATP5M45/ATP5M46/ATP5M47/ATP5M48/ATP5M49/ATP5M50/ATP5M51/ATP5M52/ATP5M53/ATP5M54/ATP5M55/ATP5M56/ATP5M57/ATP5M58/ATP5M59/ATP5M60/ATP5M61/ATP5M62/ATP5M63/ATP5M64/ATP5M65/ATP5M66/ATP5M67/ATP5M68/ATP5M69/ATP5M70/ATP5M71/ATP5M72/ATP5M73/ATP5M74/ATP5M75/ATP5M76/ATP5M77/ATP5M78/ATP5M79/ATP5M80/ATP5M81/ATP5M82/ATP5M83/ATP5M84/ATP5M85/ATP5M86/ATP5M87/ATP5M88/ATP5M89/ATP5M90/ATP5M91/ATP5M92/ATP5M93/ATP5M94/ATP5M95/ATP5M96/ATP5M97/ATP5M98/ATP5M99/ATP5M100 | -19         | cluster3 |
| GO Biological Processes | 19         | GO:0009145 | purine nucleoside triphosphate biosynthetic process                 | 19_GO:0008152 metabolic process                         | -2.2 | 75         | 32     | 30304               | 96          | 59                | 14                   | 24      | 5.5        | 226498506509513151451615185214715955195561063284833                                                                                                | ALDOA/ATP5F1A/ATP5F1B/ATP5F1C/ATP5F1D/ATP5F1E/ATP5M1/ATP5M2/ATP5M3/ATP5M4/ATP5M5/ATP5M6/ATP5M7/ATP5M8/ATP5M9/ATP5M10/ATP5M11/ATP5M12/ATP5M13/ATP5M14/ATP5M15/ATP5M16/ATP5M17/ATP5M18/ATP5M19/ATP5M20/ATP5M21/ATP5M22/ATP5M23/ATP5M24/ATP5M25/ATP5M26/ATP5M27/ATP5M28/ATP5M29/ATP5M30/ATP5M31/ATP5M32/ATP5M33/ATP5M34/ATP5M35/ATP5M36/ATP5M37/ATP5M38/ATP5M39/ATP5M40/ATP5M41/ATP5M42/ATP5M43/ATP5M44/ATP5M45/ATP5M46/ATP5M47/ATP5M48/ATP5M49/ATP5M50/ATP5M51/ATP5M52/ATP5M53/ATP5M54/ATP5M55/ATP5M56/ATP5M57/ATP5M58/ATP5M59/ATP5M60/ATP5M61/ATP5M62/ATP5M63/ATP5M64/ATP5M65/ATP5M66/ATP5M67/ATP5M68/ATP5M69/ATP5M70/ATP5M71/ATP5M72/ATP5M73/ATP5M74/ATP5M75/ATP5M76/ATP5M77/ATP5M78/ATP5M79/ATP5M80/ATP5M81/ATP5M82/ATP5M83/ATP5M84/ATP5M85/ATP5M86/ATP5M87/ATP5M88/ATP5M89/ATP5M90/ATP5M91/ATP5M92/ATP5M93/ATP5M94/ATP5M95/ATP5M96/ATP5M97/ATP5M98/ATP5M99/ATP5M100 | -19         | cluster3 |
| GO Biological Processes | 19         | GO:0009201 | ribonucleoside triphosphate biosynthetic process                    | 19_GO:0008152 metabolic process                         | -2.2 | 71         | 31     | 30304               | 101         | 59                | 14                   | 24      | 5.5        | 226498506509513151451615185214715955195561063284833                                                                                                | ALDOA/ATP5F1A/ATP5F1B/ATP5F1C/ATP5F1D/ATP5F1E/ATP5M1/ATP5M2/ATP5M3/ATP5M4/ATP5M5/ATP5M6/ATP5M7/ATP5M8/ATP5M9/ATP5M10/ATP5M11/ATP5M12/ATP5M13/ATP5M14/ATP5M15/ATP5M16/ATP5M17/ATP5M18/ATP5M19/ATP5M20/ATP5M21/ATP5M22/ATP5M23/ATP5M24/ATP5M25/ATP5M26/ATP5M27/ATP5M28/ATP5M29/ATP5M30/ATP5M31/ATP5M32/ATP5M33/ATP5M34/ATP5M35/ATP5M36/ATP5M37/ATP5M38/ATP5M39/ATP5M40/ATP5M41/ATP5M42/ATP5M43/ATP5M44/ATP5M45/ATP5M46/ATP5M47/ATP5M48/ATP5M49/ATP5M50/ATP5M51/ATP5M52/ATP5M53/ATP5M54/ATP5M55/ATP5M56/ATP5M57/ATP5M58/ATP5M59/ATP5M60/ATP5M61/ATP5M62/ATP5M63/ATP5M64/ATP5M65/ATP5M66/ATP5M67/ATP5M68/ATP5M69/ATP5M70/ATP5M71/ATP5M72/ATP5M73/ATP5M74/ATP5M75/ATP5M76/ATP5M77/ATP5M78/ATP5M79/ATP5M80/ATP5M81/ATP5M82/ATP5M83/ATP5M84/ATP5M85/ATP5M86/ATP5M87/ATP5M88/ATP5M89/ATP5M90/ATP5M91/ATP5M92/ATP5M93/ATP5M94/ATP5M95/ATP5M96/ATP5M97/ATP5M98/ATP5M99/ATP5M100 | -19         | cluster3 |
| GO Biological Processes | 19         | GO:0015986 | proton motive force-driven ATP synthesis                            | 19_GO:0008152 metabolic process                         | -2.2 | 91         | 34     | 30304               | 73          | 59                | 13                   | 22      | 5.4        | 498506509513151451615185214715955195561063284833                                                                                                   | ATP5F1A/ATP5F1B/ATP5F1C/ATP5F1D/ATP5F1E/ATP5M1/ATP5M2/ATP5M3/ATP5M4/ATP5M5/ATP5M6/ATP5M7/ATP5M8/ATP5M9/ATP5M10/ATP5M11/ATP5M12/ATP5M13/ATP5M14/ATP5M15/ATP5M16/ATP5M17/ATP5M18/ATP5M19/ATP5M20/ATP5M21/ATP5M22/ATP5M23/ATP5M24/ATP5M25/ATP5M26/ATP5M27/ATP5M28/ATP5M29/ATP5M30/ATP5M31/ATP5M32/ATP5M33/ATP5M34/ATP5M35/ATP5M36/ATP5M37/ATP5M38/ATP5M39/ATP5M40/ATP5M41/ATP5M42/ATP5M43/ATP5M44/ATP5M45/ATP5M46/ATP5M47/ATP5M48/ATP5M49/ATP5M50/ATP5M51/ATP5M52/ATP5M53/ATP5M54/ATP5M55/ATP5M56/ATP5M57/ATP5M58/ATP5M59/ATP5M60/ATP5M61/ATP5M62/ATP5M63/ATP5M64/ATP5M65/ATP5M66/ATP5M67/ATP5M68/ATP5M69/ATP5M70/ATP5M71/ATP5M72/ATP5M73/ATP5M74/ATP5M75/ATP5M76/ATP5M77/ATP5M78/ATP5M79/ATP5M80/ATP5M81/ATP5M82/ATP5M83/ATP5M84/ATP5M85/ATP5M86/ATP5M87/ATP5M88/ATP5M89/ATP5M90/ATP5M91/ATP5M92/ATP5M93/ATP5M94/ATP5M95/ATP5M96/ATP5M97/ATP5M98/ATP5M99/ATP5M100       | -19         | cluster3 |
| GO Biological Processes | 19         | GO:0009142 | nucleoside triphosphate biosynthetic process                        | 19_GO:0008152 metabolic process                         | -2.2 | 66         | 30     | 30304               | 109         | 59                | 14                   | 24      | 5.5        | 226498506509513151451615185214715955195561063284833                                                                                                | ALDOA/ATP5F1A/ATP5F1B/ATP5F1C/ATP5F1D/ATP5F1E/ATP5M1/ATP5M2/ATP5M3/ATP5M4/ATP5M5/ATP5M6/ATP5M7/ATP5M8/ATP5M9/ATP5M10/ATP5M11/ATP5M12/ATP5M13/ATP5M14/ATP5M15/ATP5M16/ATP5M17/ATP5M18/ATP5M19/ATP5M20/ATP5M21/ATP5M22/ATP5M23/ATP5M24/ATP5M25/ATP5M26/ATP5M27/ATP5M28/ATP5M29/ATP5M30/ATP5M31/ATP5M32/ATP5M33/ATP5M34/ATP5M35/ATP5M36/ATP5M37/ATP5M38/ATP5M39/ATP5M40/ATP5M41/ATP5M42/ATP5M43/ATP5M44/ATP5M45/ATP5M46/ATP5M47/ATP5M48/ATP5M49/ATP5M50/ATP5M51/ATP5M52/ATP5M53/ATP5M54/ATP5M55/ATP5M56/ATP5M57/ATP5M58/ATP5M59/ATP5M60/ATP5M61/ATP5M62/ATP5M63/ATP5M64/ATP5M65/ATP5M66/ATP5M67/ATP5M68/ATP5M69/ATP5M70/ATP5M71/ATP5M72/ATP5M73/ATP5M74/ATP5M75/ATP5M76/ATP5M77/ATP5M78/ATP5M79/ATP5M80/ATP5M81/ATP5M82/ATP5M83/ATP5M84/ATP5M85/ATP5M86/ATP5M87/ATP5M88/ATP5M89/ATP5M90/ATP5M91/ATP5M92/ATP5M93/ATP5M94/ATP5M95/ATP5M96/ATP5M97/ATP5M98/ATP5M99/ATP5M100 | -18         | cluster3 |
| GO Biological Processes | 19         | GO:0046034 | ATP metabolic process                                               | 19_GO:0008152 metabolic process                         | -2.1 | 62         | 29     | 30304               | 116         | 59                | 14                   | 24      | 5.5        | 226498506509513151451615185214715955195561063284833                                                                                                | ALDOA/ATP5F1A/ATP5F1B/ATP5F1C/ATP5F1D/ATP5F1E/ATP5M1/ATP5M2/ATP5M3/ATP5M4/ATP5M5/ATP5M6/ATP5M7/ATP5M8/ATP5M9/ATP5M10/ATP5M11/ATP5M12/ATP5M13/ATP5M14/ATP5M15/ATP5M16/ATP5M17/ATP5M18/ATP5M19/ATP5M20/ATP5M21/ATP5M22/ATP5M23/ATP5M24/ATP5M25/ATP5M26/ATP5M27/ATP5M28/ATP5M29/ATP5M30/ATP5M31/ATP5M32/ATP5M33/ATP5M34/ATP5M35/ATP5M36/ATP5M37/ATP5M38/ATP5M39/ATP5M40/ATP5M41/ATP5M42/ATP5M43/ATP5M44/ATP5M45/ATP5M46/ATP5M47/ATP5M48/ATP5M49/ATP5M50/ATP5M51/ATP5M52/ATP5M53/ATP5M54/ATP5M55/ATP5M56/ATP5M57/ATP5M58/ATP5M59/ATP5M60/ATP5M61/ATP5M62/ATP5M63/ATP5M64/ATP5M65/AT                                                                                                                                                                                                                                                                                       |             |          |

|                         |    |            |                                                |                                                         |      |     |     |       |     |    |    |     |     |                                                    |                                                                     |       |          |
|-------------------------|----|------------|------------------------------------------------|---------------------------------------------------------|------|-----|-----|-------|-----|----|----|-----|-----|----------------------------------------------------|---------------------------------------------------------------------|-------|----------|
| GO Biological Processes | 19 | GO:0048514 | blood vessel morphogenesis                     | 19_GO:0032502 developmental process                     | -5.7 | 9.6 | 7.9 | 30304 | 429 | 59 | 8  | 14  | 4.5 | 348 506 2876 4851 6659 7045 93974 28240            | APOE ATPSF1 BGPIX NOTCH1 SOX4 TGFB ATPSF1 NAXE                      | -3.6  | cluster3 |
| GO Biological Processes | 19 | GO:0001568 | blood vessel development                       | 19_GO:0032502 developmental process                     | -5.1 | 7.9 | 7   | 30304 | 523 | 59 | 8  | 14  | 4.5 | 348 506 2876 4851 6659 7045 93974 28240            | APOE ATPSF1 BGPIX NOTCH1 SOX4 TGFB ATPSF1 NAXE                      | -3    | cluster3 |
| GO Biological Processes | 19 | GO:0001944 | vasculature development                        | 19_GO:0032502 developmental process                     | -5   | 7.6 | 6.8 | 30304 | 543 | 59 | 8  | 14  | 4.5 | 348 506 2876 4851 6659 7045 93974 28240            | APOE ATPSF1 BGPIX NOTCH1 SOX4 TGFB ATPSF1 NAXE                      | -2.9  | cluster3 |
| GO Biological Processes | 19 | GO:0001525 | angiogenesis                                   | 19_GO:0032502 developmental process                     | -4.3 | 9.2 | 6.7 | 30304 | 336 | 59 | 6  | 10  | 3.9 | 506 2876 4851 7045 93974 128240                    | ATPSF1 BGPIX NOTCH1 TGFB ATPSF1 NAXE                                | -2.3  | cluster3 |
| GO Biological Processes | 19 | GO:0030162 | regulation of proteolysis                      | 19_GO:0008152 metabolic process                         | -3.7 | 5.8 | 5.3 | 30304 | 618 | 59 | 7  | 12  | 4.2 | 348 2537 2876 6923 10399 2994 9793974              | APOE H16 GPIX1 ELOB RACK1 NOP55 ATPSF1                              | -1.8  | cluster3 |
| GO Biological Processes | 19 | GO:2000147 | positive regulation of cell motility           | 19_GO:0040011 locomotion                                | -3   | 5.1 | 4.5 | 30304 | 600 | 59 | 6  | 10  | 3.9 | 498 506 3640 4851 6678 10399                       | ATPSF1 ATPSF1 BNLS1 NOTCH1 SPARC RACK1                              | -1.3  | cluster3 |
| GO Biological Processes | 19 | GO:0040017 | positive regulation of locomotion              | 19_GO:0040011 locomotion                                | -2.9 | 5   | 4.4 | 30304 | 614 | 59 | 6  | 10  | 3.9 | 498 506 3640 4851 6678 10399                       | ATPSF1 ATPSF1 BNLS1 NOTCH1 SPARC RACK1                              | -1.3  | cluster3 |
| GO Biological Processes | 19 | GO:0010810 | regulation of cell-substrate adhesion          | 19_GO:0050789 regulation of biological process          | -2   | 7   | 3.9 | 30304 | 220 | 59 | 3  | 5.1 | 2.9 | 335 1029 4851                                      | APOA1 CDKN2A NOTCH1                                                 | -0.64 | cluster3 |
| GO Biological Processes | 19 | GO:0001501 | skeletal system development                    | 19_GO:0032502 developmental process                     | -6.3 | 9.2 | 8.2 | 30304 | 500 | 59 | 9  | 15  | 4.7 | 871 1116 1277 1278 1281 1462 1490 3491 10468       | SERPINH1 CH3L1 COL1A1 COL1A2 COL3A1 VCAN CCN2 CCN1 FST              | -4.1  | cluster4 |
| GO Biological Processes | 19 | GO:0051216 | cartilage development                          | 19_GO:0032502 developmental process                     | -6   | 18  | 9.8 | 30304 | 172 | 59 | 6  | 10  | 3.9 | 871 1116 1277 1278 1281 1490 3491                  | SERPINH1 CH3L1 COL1A1 COL1A2 COL3A1 CCN2 CCN1                       | -3.8  | cluster4 |
| GO Biological Processes | 19 | GO:0001503 | ossification                                   | 19_GO:0032501 multicellular organismal process          | -5.9 | 13  | 8.7 | 30304 | 286 | 59 | 7  | 12  | 4.2 | 1277 1278 1462 1490 3486 3491 16696                | COL1A1 COL1A2 VCAN CCN2 IGFBP3 CCN1 SPP1                            | -3.7  | cluster4 |
| GO Biological Processes | 19 | GO:2000147 | positive regulation of cell motility           | 19_GO:0040011 locomotion                                | -5.6 | 7.7 | 7.3 | 30304 | 600 | 59 | 9  | 15  | 4.7 | 949 1277 1672 2316 3491 5962 9590 10457 284119     | SCARB1 COL1A1 DEFB1 FLN ACCN1 RDNA AKAP12 GPNM BCAVIN1              | -3.5  | cluster4 |
| GO Biological Processes | 19 | GO:0040017 | positive regulation of locomotion              | 19_GO:0040011 locomotion                                | -5.6 | 7.5 | 7.2 | 30304 | 614 | 59 | 9  | 15  | 4.7 | 949 1277 1672 2316 3491 5962 9590 10457 284119     | SCARB1 COL1A1 DEFB1 FLN ACCN1 RDNA AKAP12 GPNM BCAVIN1              | -3.4  | cluster4 |
| GO Biological Processes | 19 | GO:0030199 | collagen fibril organization                   | 19_GO:0009987 cellular process                          | -5.3 | 35  | 11  | 30304 | 59  | 59 | 4  | 6.8 | 3.3 | 871 1277 1278 1281                                 | SERPINH1 COL1A1 COL1A2 COL3A1                                       | -3.1  | cluster4 |
| GO Biological Processes | 19 | GO:0061448 | connective tissue development                  | 19_GO:0032502 developmental process                     | -5.3 | 14  | 8.4 | 30304 | 228 | 59 | 6  | 10  | 3.9 | 871 1116 1277 1278 1281 1490 3491                  | SERPINH1 CH3L1 COL1A1 COL1A2 COL3A1 CCN2 CCN1                       | -3.1  | cluster4 |
| GO Biological Processes | 19 | GO:0001568 | blood vessel development                       | 19_GO:0032502 developmental process                     | -5.1 | 7.9 | 7   | 30304 | 523 | 59 | 8  | 14  | 4.5 | 133 1277 1278 1281 1490 2316 3491 23554            | ADM COL1A1 COL1A2 COL3A1 CCN2 FLN CCN1 TSPAN12                      | -3    | cluster4 |
| GO Biological Processes | 19 | GO:0001649 | osteoblast differentiation                     | 19_GO:0032502 developmental process                     | -5.1 | 18  | 9   | 30304 | 141 | 59 | 5  | 8.5 | 3.6 | 1277 1462 3486 3491 6696                           | COL1A1 VCAN IGFBP3 CCN1 SPP1                                        | -3    | cluster4 |
| GO Biological Processes | 19 | GO:0001944 | vasculature development                        | 19_GO:0032502 developmental process                     | -5   | 7.6 | 6.8 | 30304 | 543 | 59 | 8  | 14  | 4.5 | 133 1277 1278 1281 1490 2316 3491 23554            | ADM COL1A1 COL1A2 COL3A1 CCN2 FLN CCN1 TSPAN12                      | -2.9  | cluster4 |
| GO Biological Processes | 19 | GO:0070372 | regulation of ERK1 and ERK2 cascade            | 19_GO:0050896 response to stimulus                      | -4.5 | 9.8 | 6.9 | 30304 | 313 | 59 | 6  | 10  | 3.9 | 1116 1490 3491 8767 9590 10457                     | CH3L1 CCN2 CCN1 RIPK2 AKAP12 GPNMB                                  | -2.5  | cluster4 |
| GO Biological Processes | 19 | GO:0048514 | blood vessel morphogenesis                     | 19_GO:0032502 developmental process                     | -3.7 | 7.2 | 5.7 | 30304 | 429 | 59 | 6  | 10  | 3.9 | 133 1281 1490 2316 3491 123554                     | ADM COL3A1 CCN2 FLN ACCN1 TSPAN12                                   | -1.9  | cluster4 |
| GO Biological Processes | 19 | GO:0030162 | regulation of proteolysis                      | 19_GO:0008152 metabolic process                         | -3.7 | 5.8 | 5.3 | 30304 | 618 | 59 | 7  | 12  | 4.2 | 871 1718 2810 6280 8767 10418 822836               | SERPINH1 DHC24 SFN1 S100A9 RIPK2 SPO11 RHOB B3                      | -1.8  | cluster4 |
| GO Biological Processes | 19 | GO:0052548 | regulation of endopeptidase activity           | 19_GO:0008152 metabolic process                         | -3.6 | 8.9 | 6   | 30304 | 288 | 59 | 5  | 8.5 | 3.6 | 871 1718 2810 6280 8767                            | SERPINH1 DHC24 SFN1 S100A9 RIPK2                                    | -1.8  | cluster4 |
| GO Biological Processes | 19 | GO:0043410 | positive regulation of MAPK cascade            | 19_GO:0048518 positive regulation of biological process | -3.5 | 6.5 | 5.3 | 30304 | 474 | 59 | 6  | 10  | 3.9 | 1116 1490 3486 8767 9590 10457                     | CH3L1 CCN2 IGFBP3 RIPK2 AKAP12 GPNMB                                | -1.7  | cluster4 |
| GO Biological Processes | 19 | GO:0043408 | regulation of MAPK cascade                     | 19_GO:0050896 response to stimulus                      | -3.5 | 5.3 | 5   | 30304 | 673 | 59 | 7  | 12  | 4.2 | 1116 1490 3486 3491 8767 9590 10457                | CH3L1 CCN2 IGFBP3 CCN1 RIPK2 AKAP12 GPNMB                           | -1.7  | cluster4 |
| GO Biological Processes | 19 | GO:0052547 | regulation of peptidase activity               | 19_GO:0008152 metabolic process                         | -3.4 | 8.2 | 5.7 | 30304 | 312 | 59 | 5  | 8.5 | 3.6 | 871 1718 2810 6280 8767                            | SERPINH1 DHC24 SFN1 S100A9 RIPK2                                    | -1.7  | cluster4 |
| GO Biological Processes | 19 | GO:0006935 | chemotaxis                                     | 19_GO:0040011 locomotion                                | -3.3 | 7.5 | 5.4 | 30304 | 341 | 59 | 5  | 8.5 | 3.6 | 1672 3491 6280 9547 10457                          | DEFB1 CCN1 S100A9 CXCL1 GPNMB                                       | -1.5  | cluster4 |
| GO Biological Processes | 19 | GO:0042330 | taxis                                          | 19_GO:0040011 locomotion                                | -3.3 | 7.5 | 5.3 | 30304 | 343 | 59 | 5  | 8.5 | 3.6 | 1672 3491 6280 9547 10457                          | DEFB1 CCN1 S100A9 CXCL1 GPNMB                                       | -1.5  | cluster4 |
| GO Biological Processes | 19 | GO:0040011 | locomotion                                     | 19_GO:0040011 locomotion                                | -3.2 | 7.1 | 5.2 | 30304 | 362 | 59 | 5  | 8.5 | 3.6 | 1672 3491 6280 9547 10457                          | DEFB1 CCN1 S100A9 CXCL1 GPNMB                                       | -1.5  | cluster4 |
| GO Biological Processes | 19 | GO:0001525 | angiogenesis                                   | 19_GO:0032502 developmental process                     | -2.4 | 6.1 | 4.2 | 30304 | 336 | 59 | 4  | 6.8 | 3.3 | 1490 2316 3491 23554                               | CCN2 FLN CCN1 TSPAN12                                               | -0.89 | cluster4 |
| GO Biological Processes | 19 | GO:0010810 | regulation of cell-substrate adhesion          | 19_GO:0050789 regulation of biological process          | -2   | 7   | 3.9 | 30304 | 220 | 59 | 3  | 5.1 | 2.9 | 1277 2316 3491                                     | COL1A1 FLN CCN1                                                     | -0.64 | cluster4 |
| GO Biological Processes | 19 | GO:0051085 | chaperone cofactor-dependent protein refolding | 19_GO:0008152 metabolic process                         | -8.1 | 73  | 19  | 30304 | 32  | 65 | 5  | 7.7 | 3.3 | 3303 3304 3310 3311 3337                           | HSPA1A HSPA1B HSPA6 HSPA7 DNAJB1                                    | -5.7  | cluster5 |
| GO Biological Processes | 19 | GO:0051084 | 'de novo' post-translational protein folding   | 19_GO:0008152 metabolic process                         | -7.8 | 63  | 17  | 30304 | 37  | 65 | 5  | 7.7 | 3.3 | 3303 3304 3310 3311 3337                           | HSPA1A HSPA1B HSPA6 HSPA7 DNAJB1                                    | -5.4  | cluster5 |
| GO Biological Processes | 19 | GO:0064548 | 'de novo' protein folding                      | 19_GO:0008152 metabolic process                         | -7.6 | 57  | 17  | 30304 | 41  | 65 | 5  | 7.7 | 3.3 | 3303 3304 3310 3311 3337                           | HSPA1A HSPA1B HSPA6 HSPA7 DNAJB1                                    | -5.2  | cluster5 |
| GO Biological Processes | 19 | GO:0042026 | protein refolding                              | 19_GO:0008152 metabolic process                         | -6.6 | 75  | 17  | 30304 | 25  | 65 | 4  | 6.2 | 3   | 3303 3304 3310 3311                                | HSPA1A HSPA1B HSPA6 HSPA7                                           | -4.4  | cluster5 |
| GO Biological Processes | 19 | GO:0010810 | regulation of cell-substrate adhesion          | 19_GO:0050789 regulation of biological process          | -6.3 | 15  | 9.5 | 30304 | 220 | 65 | 7  | 11  | 3.8 | 2335 2633 5054 6480 7422 980690102                 | FN1 GBP1 SERPINE1 STG6GAL1 VEGFA SPOCK2 PHLD2B                      | -4.1  | cluster5 |
| GO Biological Processes | 19 | GO:0061077 | chaperone-mediated protein folding             | 19_GO:0008152 metabolic process                         | -6.3 | 32  | 12  | 30304 | 74  | 65 | 5  | 7.7 | 3.3 | 3303 3304 3310 3311 3337                           | HSPA1A HSPA1B HSPA6 HSPA7 DNAJB1                                    | -4    | cluster5 |
| GO Biological Processes | 19 | GO:0030162 | regulation of proteolysis                      | 19_GO:0008152 metabolic process                         | -6.1 | 7.5 | 7.6 | 30304 | 618 | 65 | 10 | 15  | 4.5 | 3303 3304 5054 6279 7124 7422 7498 8743 9806 90637 | HSPA1A HSPA1B SERPINE1 S100A8 TNF VEGFA XDH TNF SF10 SPOCK2 ZFAND2A | -3.9  | cluster5 |
| GO Biological Processes | 19 | GO:0090084 | negative regulation of inclusion body assembly | 19_GO:0048519 negative regulation of biological process | -5.7 | 120 | 19  | 30304 | 12  | 65 | 3  | 4.6 | 2.6 | 3303 3304 3337                                     | HSPA1A HSPA1B DNAJB1                                                | -3.5  | cluster5 |
| GO Biological Processes | 19 | GO:0052548 | regulation of endopeptidase activity           | 19_GO:0008152 metabolic process                         | -5.5 | 11  | 8.2 | 30304 | 288 | 65 | 7  | 11  | 3.8 | 5054 6279 7124 7422 7498 8743 9806                 | SERPINE1 S100A8 TNF VEGFA XDH TNF SPOCK2                            | -3.4  | cluster5 |
| GO Biological Processes | 19 | GO:0052547 | regulation of peptidase activity               | 19_GO:0008152 metabolic process                         | -5.3 | 10  | 7.8 | 30304 | 312 | 65 | 7  | 11  | 3.8 | 5054 6279 7124 7422 7498 8743 9806                 | SERPINE1 S100A8 TNF VEGFA XDH TNF SPOCK2                            | -3.2  | cluster5 |
| GO Biological Processes | 19 | GO:0034605 | cellular response to heat                      | 19_GO:0050896 response to stimulus                      | -5.3 | 35  | 11  | 30304 | 54  | 65 | 4  | 6.2 | 3   | 3303 3304 3310 3337                                | HSPA1A HSPA1B HSPA6 DNAJB1                                          | -3.1  | cluster5 |
| GO Biological Processes | 19 | GO:2000147 | positive regulation of cell motility           | 19_GO:0040011 locomotion                                | -3.5 | 5.4 | 5.1 | 30304 | 600 | 65 | 7  | 11  | 3.8 | 2335 3912 5054 7124 7422 98062328                  | FN1 LAMB1 SERPINE1 TNF VEGFA SPOCK2 SASH1                           | -1.7  | cluster5 |
| GO Biological Processes | 19 | GO:0040017 | positive regulation of locomotion              | 19_GO:0040011 locomotion                                | -3.5 | 5.3 | 5   | 30304 | 614 | 65 | 7  | 11  | 3.8 | 2335 3912 5054 7124 7422 98062328                  | FN1 LAMB1 SERPINE1 TNF VEGFA SPOCK2 SASH1                           | -1.7  | cluster5 |
| GO Biological Processes | 19 | GO:0043408 | regulation of MAPK cascade                     | 19_GO:0050896 response to stimulus                      | -2.5 | 4.2 | 3.8 | 30304 | 673 | 65 | 6  | 9.2 | 3.6 | 2335 2633 7124 7422 7498 2328                      | FN1 GBP1 TNF VEGFA XDH SASH1                                        | -0.98 | cluster5 |
| GO Biological Processes | 19 | GO:0001525 | angiogenesis                                   | 19_GO:0032502 developmental process                     | -2.2 | 5.6 | 3.9 | 30304 | 336 | 65 | 4  | 6.2 | 3   | 2335 5054 7127 7422                                | FN1 SERPINE1 TNF FAI2 VEGFA                                         | -0.78 | cluster5 |

**Table S4 Top 10 DEGs of each FTE cluster.**

|    | p_val             | avg_log2FC  | pct.1 | pct.2 | p_val_adj         | cluster     | gene       |
|----|-------------------|-------------|-------|-------|-------------------|-------------|------------|
| 1  | 0                 | 4.88662983  | 0.848 | 0.142 | 0                 | FTCEC_TFF3+ | TFF3       |
| 2  | 0                 | 4.484049045 | 0.411 | 0.085 | 0                 | FTCEC_TFF3+ | SCGB1D4    |
| 3  | 0                 | 4.420223043 | 0.915 | 0.073 | 0                 | FTCEC_TFF3+ | TMEM190    |
| 4  | 0                 | 4.041499653 | 0.965 | 0.284 | 0                 | FTCEC_TFF3+ | TPPP3      |
| 5  | 0                 | 3.595317138 | 0.96  | 0.216 | 0                 | FTCEC_TFF3+ | C1orf194   |
| 6  | 0                 | 3.296124274 | 0.939 | 0.178 | 0                 | FTCEC_TFF3+ | FAM183A    |
| 7  | 0                 | 3.227884344 | 0.985 | 0.689 | 0                 | FTCEC_TFF3+ | CAPS       |
| 8  | 0                 | 3.02763478  | 0.87  | 0.132 | 0                 | FTCEC_TFF3+ | AL357093.2 |
| 9  | 0                 | 2.833839245 | 0.942 | 0.651 | 0                 | FTCEC_TFF3+ | CETN2      |
| 10 | 0                 | 2.808400722 | 0.888 | 0.571 | 0                 | FTCEC_TFF3+ | AGR3       |
| 11 | 0                 | 2.481098871 | 0.886 | 0.402 | 0                 | FTCEC_SOD3+ | SOD3       |
| 12 | 0                 | 2.397556316 | 0.441 | 0.043 | 0                 | FTCEC_SOD3+ | FGA        |
| 13 | 0                 | 2.137498043 | 0.818 | 0.416 | 0                 | FTCEC_SOD3+ | G0S2       |
| 14 | 0                 | 2.087584951 | 0.958 | 0.304 | 0                 | FTCEC_SOD3+ | C20orf85   |
| 15 | 0                 | 2.046388699 | 0.946 | 0.295 | 0                 | FTCEC_SOD3+ | C9orf24    |
| 16 | 0                 | 2.022019188 | 0.824 | 0.416 | 0                 | FTCEC_SOD3+ | ID1        |
| 17 | 0                 | 1.963114663 | 0.902 | 0.409 | 0                 | FTCEC_SOD3+ | ODF3B      |
| 18 | 0                 | 1.962046109 | 0.794 | 0.255 | 0                 | FTCEC_SOD3+ | AK1        |
| 19 | 0                 | 1.918008185 | 0.969 | 0.884 | 0                 | FTCEC_SOD3+ | TUBB4B     |
|    | 1.373481          |             |       |       | 7.835026          |             |            |
| 20 | 80614641<br>e-183 | 1.881414624 | 0.678 | 0.422 | 96316217<br>e-179 | FTCEC_SOD3+ | RRAD       |
| 21 | 0                 | 4.437025305 | 0.97  | 0.277 | 0                 | FTPEC       | CXCR4      |
| 22 | 0                 | 4.156778788 | 0.845 | 0.086 | 0                 | FTPEC       | CCL5       |
| 23 | 0                 | 4.018635083 | 0.969 | 0.205 | 0                 | FTPEC       | SRGN       |
| 24 | 0                 | 3.436708681 | 0.869 | 0.403 | 0                 | FTPEC       | CREM       |
| 25 | 0                 | 3.405777796 | 0.942 | 0.769 | 0                 | FTPEC       | BTG1       |
| 26 | 0                 | 3.397541129 | 0.77  | 0.084 | 0                 | FTPEC       | RGS1       |
|    | 1.620563          |             |       |       | 9.244504          |             |            |
| 27 | 45665196<br>e-265 | 3.357187546 | 0.534 | 0.134 | 23847108<br>e-261 | FTPEC       | CCL4       |
| 28 | 0                 | 3.334776614 | 0.762 | 0.052 | 0                 | FTPEC       | CD7        |
| 29 | 0                 | 3.198637357 | 0.827 | 0.059 | 0                 | FTPEC       | CD52       |
| 30 | 0                 | 3.093385719 | 0.514 | 0.038 | 0                 | FTPEC       | KLRB1      |
| 31 | 0                 | 2.602857333 | 0.994 | 0.303 | 0                 | FTSEC1      | GAS5       |
| 32 | 0                 | 2.216783972 | 0.631 | 0.219 | 0                 | FTSEC1      | CXCL1      |
| 33 | 0                 | 2.171665815 | 0.997 | 0.354 | 0                 | FTSEC1      | SNHG29     |
| 34 | 0                 | 1.872047098 | 0.997 | 0.463 | 0                 | FTSEC1      | KRT7       |
| 35 | 0                 | 1.823487651 | 0.878 | 0.344 | 0                 | FTSEC1      | CRYAB      |
| 36 | 0                 | 1.789245454 | 0.998 | 0.532 | 0                 | FTSEC1      | EEF1G      |
| 37 | 0                 | 1.774935879 | 0.91  | 0.485 | 0                 | FTSEC1      | CXCL2      |
| 38 | 0                 | 1.740572791 | 1     | 0.905 | 0                 | FTSEC1      | RPL17      |
| 39 | 0                 | 1.656773503 | 0.763 | 0.092 | 0                 | FTSEC1      | H19        |
| 40 | 0                 | 1.620112564 | 0.998 | 0.458 | 0                 | FTSEC1      | NME2       |
| 41 | 0                 | 1.528489076 | 0.611 | 0.068 | 0                 | FTSEC2      | CYR61      |
| 42 | 0                 | 1.238792091 | 0.785 | 0.279 | 0                 | FTSEC2      | FKBP2      |
| 43 | 0                 | 1.199711892 | 0.944 | 0.753 | 0                 | FTSEC2      | CRISP3     |
| 44 | 0                 | 1.194117348 | 0.64  | 0.09  | 0                 | FTSEC2      | C6orf48    |
| 45 | 0                 | 1.138623618 | 0.719 | 0.465 | 0                 | FTSEC2      | MGST1      |
| 46 | 0                 | 1.083753269 | 0.79  | 0.7   | 0                 | FTSEC2      | HNRNPH1    |
| 47 | 0                 | 1.045405058 | 0.627 | 0.068 | 0                 | FTSEC2      | C8orf59    |

|    |          |             |       |       |          |        |          |
|----|----------|-------------|-------|-------|----------|--------|----------|
|    | 5.493907 |             |       |       | 3.133999 |        |          |
| 48 | 48800114 | 1.012509566 | 0.996 | 0.98  | 52653025 | FTSEC2 | RPL31    |
|    | e-38     |             |       |       | e-33     |        |          |
| 49 | 0        | 0.942999817 | 0.998 | 0.984 | 0        | FTSEC2 | RPL27A   |
| 50 | 0        | 0.911760495 | 0.733 | 0.145 | 0        | FTSEC2 | MINOS1   |
| 51 | 0        | 3.949494162 | 0.983 | 0.232 | 0        | FTSEC3 | OVGP1    |
| 52 | 0        | 2.358395241 | 0.778 | 0.177 | 0        | FTSEC3 | SERPINA3 |
| 53 | 0        | 2.319363901 | 0.97  | 0.413 | 0        | FTSEC3 | SPARCL1  |
| 54 | 0        | 2.208513863 | 0.904 | 0.073 | 0        | FTSEC3 | PKHD1L1  |
| 55 | 0        | 2.206467497 | 0.97  | 0.492 | 0        | FTSEC3 | USP53    |
| 56 | 0        | 2.100708001 | 0.983 | 0.851 | 0        | FTSEC3 | HSP90B1  |
| 57 | 0        | 1.957807191 | 0.951 | 0.324 | 0        | FTSEC3 | EPB41L2  |
| 58 | 0        | 1.913938617 | 0.973 | 0.795 | 0        | FTSEC3 | HSPA5    |
| 59 | 0        | 1.903210971 | 0.9   | 0.271 | 0        | FTSEC3 | CPM      |
| 60 | 0        | 1.879191553 | 0.949 | 0.295 | 0        | FTSEC3 | PGR      |
| 61 | 0        | 3.606270099 | 0.821 | 0.312 | 0        | FTSEC4 | C11orf96 |
| 62 | 0        | 3.183844574 | 0.777 | 0.253 | 0        | FTSEC4 | TPM2     |
|    | 3.737520 |             |       |       | 2.132068 |        |          |
| 63 | 161478e- | 3.129257017 | 0.738 | 0.366 | 37611513 | FTSEC4 | ACTA2    |
|    | 268      |             |       |       | e-263    |        |          |
|    | 5.694722 |             |       |       | 3.248554 |        |          |
| 64 | 40587009 | 3.109486073 | 0.831 | 0.477 | 39642859 | FTSEC4 | TAGLN    |
|    | e-246    |             |       |       | e-241    |        |          |
| 65 | 0        | 2.950939959 | 0.784 | 0.25  | 0        | FTSEC4 | IGFBP5   |
| 66 | 0        | 2.709824813 | 0.469 | 0.085 | 0        | FTSEC4 | SFRP4    |
| 67 | 0        | 2.610869614 | 0.713 | 0.171 | 0        | FTSEC4 | DCN      |
|    | 1.842286 |             |       |       | 1.050932 |        |          |
| 68 | 70729272 | 2.601800111 | 0.423 | 0.116 | 45217513 | FTSEC4 | DES      |
|    | e-214    |             |       |       | e-209    |        |          |
|    | 1.607673 |             |       |       | 9.170970 |        |          |
| 69 | 04126771 | 2.543439697 | 0.552 | 0.158 | 86391167 | FTSEC4 | PTGDS    |
|    | e-279    |             |       |       | e-275    |        |          |
| 70 | 0        | 2.522325397 | 0.773 | 0.282 | 0        | FTSEC4 | MGP      |

**Table S7** Progeny pathway gene score in each FTE cluster.

|                 | FTCEC SOD3+ | FTCEC TFF3+ | FTPEC  | FTSEC1 | FTSEC2 | FTSEC3 | FTSEC4 |
|-----------------|-------------|-------------|--------|--------|--------|--------|--------|
| <b>Androgen</b> | 0.402       | -0.260      | -0.687 | 0.015  | 0.123  | 1.767  | 0.624  |
| <b>EGFR</b>     | -0.346      | -1.180      | 0.016  | 0.468  | 0.308  | -0.309 | 0.244  |
| <b>Estrogen</b> | -0.579      | 0.368       | 0.693  | -0.235 | 0.656  | 1.490  | 0.903  |
| <b>Hypoxia</b>  | -0.082      | -0.382      | 0.076  | -0.504 | -0.489 | 0.363  | 0.135  |
| <b>JAK-STAT</b> | -0.171      | -0.425      | -0.369 | -0.198 | -0.376 | 0.014  | -0.105 |
| <b>MAPK</b>     | -0.525      | -1.259      | -0.338 | 0.320  | 0.081  | -0.137 | 0.071  |
| <b>NFkB</b>     | 0.514       | -0.533      | 0.248  | 0.897  | 0.198  | 0.972  | 0.919  |
| <b>p53</b>      | 1.493       | 0.641       | -0.287 | 0.936  | 0.311  | 0.447  | 0.940  |
| <b>PI3K</b>     | -0.531      | -0.020      | 1.161  | -0.572 | 0.219  | -0.277 | -0.419 |
| <b>TGFb</b>     | 0.279       | -0.540      | -1.005 | -0.095 | -0.458 | 0.063  | 1.007  |
| <b>TNFa</b>     | 0.440       | -0.600      | 0.134  | 0.900  | 0.181  | 0.833  | 0.832  |
| <b>Trail</b>    | 0.764       | 0.670       | 0.860  | 0.159  | -0.001 | -0.856 | 0.233  |
| <b>VEGF</b>     | -1.156      | -1.269      | -0.381 | -0.274 | -0.217 | -0.204 | -0.657 |
| <b>WNT</b>      | -0.946      | -0.483      | 0.122  | -0.556 | -0.483 | -0.499 | -0.320 |



Table S8 GO enrichment result of pseudo-time variable gene cluster 4.

| Category  | CategoryID    | GO                                                                                         | Description                                             | PARENT_GO | LogP | Enrichment | Zscore | X.TotalGeneInLibrary | X.GeneInGO | X.GeneInHitList | X.GeneInGOAndHitList | X.InGO | STDV..InGO                                        | GeneID                                                                                                                                                                                                    | Hits | Log-q.value | GeneList |
|-----------|---------------|--------------------------------------------------------------------------------------------|---------------------------------------------------------|-----------|------|------------|--------|----------------------|------------|-----------------|----------------------|--------|---------------------------------------------------|-----------------------------------------------------------------------------------------------------------------------------------------------------------------------------------------------------------|------|-------------|----------|
| GO Biolog | 19 GO:0001819 | positive regulation of cytokine production                                                 | 19_GO:0048518 positive regulation of biological process | -8.2      | 11   | 9.9        | 30304  | 499                  | 63         | 11              | 17                   | 4.8    | 1116115351545309139134283554574366538915930823236 | CH13L1C<br>YBA3CYP<br>1B1 HIF1<br>A HIF16 <br>L1R1 PT<br>GS2 SOR<br>L1 BCL10<br> CD83 PL<br>CB1                                                                                                           | -4   | Cluster4    |          |
| GO Biolog | 19 GO:0035239 | tube morphogenesis                                                                         | 19_GO:0032502 developmental process                     | -6.9      | 7.8  | 8.2        | 30304  | 679                  | 63         | 11              | 17                   | 4.8    | 36715453091394946915420574370528549891580781      | AR CYP1<br>B1 HIF1A<br> LDLR NC<br>L PODXL <br>PTGS2 T<br>GM2 LGR<br>5 BCL10 <br>COL18A1                                                                                                                  | -3   | Cluster4    |          |
| GO Biolog | 19 GO:0071345 | cellular response to cytokine stimulus                                                     | 19_GO:0050896 response to stimulus                      | -6.5      | 7.2  | 7.8        | 30304  | 732                  | 63         | 11              | 17                   | 4.8    | 1116115452923309133093428355446414691636423236    | CH13L1C<br>YP1B1 P<br>DIA3 HIF<br>1A HSPA<br>5 HIF16 IL<br>1R1 MYO<br>1C NCLC<br>CL20 PLC<br>B1                                                                                                           | -2.8 | Cluster4    |          |
| GO Biolog | 19 GO:0034975 | protein folding in endoplasmic reticulum                                                   | 19_GO:0008152 metabolic process                         | -5.9      | 130  | 20         | 30304  | 11                   | 63         | 3               | 4.8                  | 2.7    | 292333097184                                      | PDIA3 HS<br>PA5 HSP9<br>0B1<br>CYP1B1 <br>HIF1A HS<br>PA5 IL1R<br>1 MYO1C<br> PODXL P<br>TG2 CC<br>L20 ADA<br>MTS1<br>CYP1B1 <br>HIF1A HS<br>PA5 IL1R<br>1 MYO1C<br> PODXL P<br>TG2 CC<br>L20 ADA<br>MTS1 | -2.3 | Cluster4    |          |
| GO Biolog | 19 GO:0030335 | positive regulation of cell migration                                                      | 19_GO:0040011 locomotion                                | -5.5      | 7.5  | 7.2        | 30304  | 575                  | 63         | 9               | 14                   | 4.4    | 15453091330934283554464145420574363649510         | 15453091330934283554464145420574363649510                                                                                                                                                                 | -2.1 | Cluster4    |          |
| GO Biolog | 19 GO:2000147 | positive regulation of cell motility                                                       | 19_GO:0040011 locomotion                                | -5.4      | 7.2  | 7          | 30304  | 600                  | 63         | 9               | 14                   | 4.4    | 15453091330934283554464145420574363649510         | 15453091330934283554464145420574363649510                                                                                                                                                                 | -2   | Cluster4    |          |
| GO Biolog | 19 GO:0040017 | positive regulation of locomotion                                                          | 19_GO:0040011 locomotion                                | -5.3      | 7.1  | 6.9        | 30304  | 614                  | 63         | 9               | 14                   | 4.4    | 15453091330934283554464145420574363649510         | 15453091330934283554464145420574363649510                                                                                                                                                                 | -2   | Cluster4    |          |
| GO Biolog | 19 GO:0036003 | positive regulation of transcription from RNA polymerase II promoter in response to stress | 19_GO:0048518 positive regulation of biological process | -5.2      | 80   | 15         | 30304  | 18                   | 63         | 3               | 4.8                  | 2.7    | 309133094582                                      | HIF1A HS<br>PA5 MUC<br>1                                                                                                                                                                                  | -2   | Cluster4    |          |
| GO Biolog | 19 GO:0071407 | cellular response to organic cyclic compound                                               | 19_GO:0050896 response to stimulus                      | -5.2      | 8    | 7.1        | 30304  | 481                  | 63         | 8               | 13                   | 4.2    | 196367154537052718423236                          | AHR AR <br>CYP1B1 J<br>TPR2 PT<br>GS2 TGM<br>2 HSP90B<br>1 PLCB1                                                                                                                                          | -2   | Cluster4    |          |
| GO Biolog | 19 GO:0046683 | response to organophosphorus                                                               | 19_GO:0050896 response to stimulus                      | -5.2      | 19   | 9.2        | 30304  | 127                  | 63         | 5               | 7.9                  | 3.4    | 1961545370957437184                               | AHR CYP<br>1B1 TPR<br>2 PTGS2 <br>HSP90B1<br>CPE DHC<br>R24 PDIA<br>3 HSPA5 I<br>F16 SOR<br>L1 HSP90<br>B1 SPON<br>1                                                                                      | -2   | Cluster4    |          |
| GO Biolog | 19 GO:0051604 | protein maturation                                                                         | 19_GO:0008152 metabolic process                         | -5.1      | 7.9  | 7          | 30304  | 489                  | 63         | 8               | 13                   | 4.2    | 1363171829233309342836653718410418                | 1363171829233309342836653718410418                                                                                                                                                                        | -2   | Cluster4    |          |
| GO Biolog | 19 GO:0070555 | response to interleukin-1                                                                  | 19_GO:0050896 response to stimulus                      | -5.1      | 18   | 9.1        | 30304  | 131                  | 63         | 5               | 7.9                  | 3.4    | 111630913554636423236                             | CH13L1 H<br>IF1A IL1<br>R1 CCL20<br> PLCB1                                                                                                                                                                | -2   | Cluster4    |          |
| GO Biolog | 19 GO:0014074 | response to purine-containing compound                                                     | 19_GO:0050896 response to stimulus                      | -4.9      | 17   | 8.7        | 30304  | 143                  | 63         | 5               | 7.9                  | 3.4    | 1961545370957437184                               | AHR CYP<br>1B1 TPR<br>2 PTGS2 <br>HSP90B1<br>ATP2B1 <br>MYO1C <br>NCL SOR<br>L1                                                                                                                           | -1.8 | Cluster4    |          |
| GO Biolog | 19 GO:1900076 | regulation of cellular response to insulin stimulus                                        | 19_GO:0050896 response to stimulus                      | -4.8      | 27   | 10         | 30304  | 71                   | 63         | 4               | 6.3                  | 3.1    | 490464146916653                                   | 490464146916653                                                                                                                                                                                           | -1.8 | Cluster4    |          |
| GO Biolog | 19 GO:0010575 | positive regulation of vascular endothelial growth factor production                       | 19_GO:0048518 positive regulation of biological process | -4.5      | 48   | 12         | 30304  | 30                   | 63         | 3               | 4.8                  | 2.7    | 154530915743                                      | CYP1B1 <br>HIF1A PT<br>GS2                                                                                                                                                                                | -1.5 | Cluster4    |          |
| GO Biolog | 19 GO:0002009 | morphogenesis of an epithelium                                                             | 19_GO:0032502 developmental process                     | -4.4      | 7.4  | 6.3        | 30304  | 452                  | 63         | 7               | 11                   |        | 36730915420704527414854989155                     | AR HIF1<br>A PODXL<br> TGM2 V<br>CL LGR5 <br>BCL10                                                                                                                                                        | -1.4 | Cluster4    |          |
| GO Biolog | 19 GO:0043618 | regulation of transcription from RNA polymerase II promoter in response to stress          | 19_GO:0050896 response to stimulus                      | -4.3      | 44   | 11         | 30304  | 33                   | 63         | 3               | 4.8                  | 2.7    | 309133094582                                      | HIF1A HS<br>PA5 MUC<br>1                                                                                                                                                                                  | -1.4 | Cluster4    |          |
| GO Biolog | 19 GO:0071347 | cellular response to interleukin-1                                                         | 19_GO:0050896 response to stimulus                      | -4.2      | 19   | 8.2        | 30304  | 102                  | 63         | 4               | 6.3                  | 3.1    | 30913554636423236                                 | HIF1A IL<br>1R1 CCL2<br>0 PLCB1                                                                                                                                                                           | -1.3 | Cluster4    |          |
| GO Biolog | 19 GO:0031667 | response to nutrient levels                                                                | 19_GO:0050896 response to stimulus                      | -4.2      | 7    | 6          | 30304  | 484                  | 63         | 7               | 11                   |        | 15453309342834949574366538915                     | CYP1B1 <br>HSPA5 IF<br>16 LDLR<br> PTGS2 S<br>ORL1 BC<br>L10                                                                                                                                              | -1.3 | Cluster4    |          |

|           |               |                                                                 |                                                         |      |     |     |       |     |    |   |     |     |                                     |                                                                                          |      |          |
|-----------|---------------|-----------------------------------------------------------------|---------------------------------------------------------|------|-----|-----|-------|-----|----|---|-----|-----|-------------------------------------|------------------------------------------------------------------------------------------|------|----------|
| GO Biolog | 19 GO:0043620 | regulation of DNA-templated transcription in response to stress | 19_GO:0050896 response to stimulus                      | -4.1 | 37  | 10  | 30304 | 39  | 63 | 3 | 4.8 | 2.7 | 3091 3309 4582                      | HIF1A HSPA5 MUC1                                                                         | -1.2 | Cluster4 |
| GO Biolog | 19 GO:0009991 | response to extracellular stimulus                              | 19_GO:0050896 response to stimulus                      | -4   | 6.6 | 5.8 | 30304 | 513 | 63 | 7 | 11  | 4   | 1545 3309 3428 3949 5743 6653 8915  | CYP1B1 HSPA5 IFI16 LDLR PTGS2 SORL1 BC110                                                | -1.2 | Cluster4 |
| GO Biolog | 19 GO:0010035 | response to inorganic substance                                 | 19_GO:0050896 response to stimulus                      | -4   | 6.5 | 5.7 | 30304 | 522 | 63 | 7 | 11  | 4   | 1545 3091 5743 7184 7356 2323 60781 | CYP1B1 HIF1A PTGS2 HSP90B1 SCGB1A1 PLCB1 COL18A1 AHR CYP1B1 HIF1A LDLR NCL PTGS2 COL18A1 | -1.2 | Cluster4 |
| GO Biolog | 19 GO:0001568 | blood vessel development                                        | 19_GO:0032502 developmental process                     | -4   | 6.4 | 5.7 | 30304 | 523 | 63 | 7 | 11  | 4   | 196 1545 3091 3949 4691 5743 80781  | CYP1B1 DHC24 HIF1A MGST1 PTGS2 SCGB1A1 AHR AR CYP1B1 LDLR MST1 BC110 PLCB1               | -1.2 | Cluster4 |
| GO Biolog | 19 GO:0006979 | response to oxidative stress                                    | 19_GO:0050896 response to stimulus                      | -3.9 | 7.9 | 6   | 30304 | 366 | 63 | 6 | 9.5 | 3.7 | 1545 1718 3091 4257 5743 7356       | HIF1A MGST1 PTGS2 SCGB1A1 AHR AR CYP1B1 LDLR MST1 BC110 PLCB1                            | -1.2 | Cluster4 |
| GO Biolog | 19 GO:0071396 | cellular response to lipid                                      | 19_GO:0050896 response to stimulus                      | -3.9 | 6.3 | 5.7 | 30304 | 531 | 63 | 7 | 11  | 4   | 196 367 1545 3949 4257 7891 523236  | AHR CYP1B1 HIF1A LDLR NCL PTGS2 COL18A1                                                  | -1.2 | Cluster4 |
| GO Biolog | 19 GO:0001944 | vasculature development                                         | 19_GO:0032502 developmental process                     | -3.9 | 6.2 | 5.6 | 30304 | 543 | 63 | 7 | 11  | 4   | 196 1545 3091 3949 4691 5743 80781  | CYP1B1 MUC1 PODXL SERPINA3 DHC24 IFI16 SORL1 SERPINA3 CHI3L1                             | -1.1 | Cluster4 |
| GO Biolog | 19 GO:0033628 | regulation of cell adhesion mediated by integrin                | 19_GO:0050789 regulation of biological process          | -3.8 | 29  | 9.1 | 30304 | 49  | 63 | 3 | 4.8 | 2.7 | 1545 4582 5420                      | CYP1B1 MUC1 PODXL SERPINA3 DHC24 IFI16 SORL1 SERPINA3 CHI3L1                             | -1.1 | Cluster4 |
| GO Biolog | 19 GO:0010951 | negative regulation of endopeptidase activity                   | 19_GO:0048519 negative regulation of biological process | -3.8 | 15  | 7.3 | 30304 | 128 | 63 | 4 | 6.3 | 3.1 | 12 1718 3428 6653                   | CYP1B1 MUC1 PODXL SERPINA3 DHC24 IFI16 SORL1 SERPINA3 CHI3L1                             | -1.1 | Cluster4 |
| GO Biolog | 19 GO:0006954 | inflammatory response                                           | 19_GO:0050896 response to stimulus                      | -3.8 | 6.1 | 5.5 | 30304 | 555 | 63 | 7 | 11  | 4   | 12 1116 1535 3091 3428 3554 6364    | CYP1B1 MUC1 PODXL SERPINA3 DHC24 IFI16 SORL1 SERPINA3 CHI3L1                             | -1.1 | Cluster4 |
| GO Biolog | 19 GO:0071320 | cellular response to cAMP                                       | 19_GO:0050896 response to stimulus                      | -3.8 | 29  | 9   | 30304 | 50  | 63 | 3 | 4.8 | 2.7 | 196 1545 3709                       | AHR CYP1B1 ITPR2                                                                         | -1.1 | Cluster4 |

**Table S12****Univariable cox-ph regression analysis**

|                           | <b>beta</b> | <b>HR (95% CI for HR)</b> | <b>wald.test</b> | <b>p.value</b> |
|---------------------------|-------------|---------------------------|------------------|----------------|
| Fraction Genome Altered   | -0.29       | 0.75 (0.38-1.5)           | 0.7              | 0.4            |
| Neoplasm Histologic Grade | 0.28        | 1.3 (0.92-1.9)            | 2.3              | 0.13           |
| Mutation Count            | -0.011      | 0.99 (0.98-1)             | 11               | 0.00077        |
| Platinum Status           | -1.4        | 0.25 (0.18-0.35)          | 72               | 1.8E-17        |
| TMB (nonsynonymous)       | -0.33       | 0.72 (0.6-0.87)           | 11               | 0.00071        |
| Tumor Stage 2009          | 0.25        | 1.3 (1.1-1.5)             | 10               | 0.0015         |
| EC3_Endo_ESM1             | 0.47        | 1.6 (1.1-2.4)             | 5.2              | 0.022          |

**Table S13 qPCR primers**

| <b>Gene-oligo name</b> | <b>sequences 5'-3'</b> |
|------------------------|------------------------|
| <b>ESM1-forward</b>    | ACTTGCTACCGCACAGTCTCAG |
| <b>ESM1-reverse</b>    | AATCCATCCCGAAGGTGCCGTA |
|                        |                        |
| <b>ACTIN-forward</b>   | GAGCTACGAGCTGCCTGACG   |
| <b>ACTIN-reverse</b>   | GTAGTTTCGTGGATGCCACAG  |

**Table S14 CRISPR gRNA and ICE analysis primers**

| <b>CRISPR gRNA</b>                                                                                 | <b>Spacer sequences without PAM</b>                                                                                                                                |
|----------------------------------------------------------------------------------------------------|--------------------------------------------------------------------------------------------------------------------------------------------------------------------|
| TGFB1<br>TGFB1<br>LAMA4                                                                            | GGCACCTCCCCCTGGCTCGG<br>TTGACTTAATTCCTCGAGAT<br>TGACATTGAAGGGAGCTCAG                                                                                               |
| <b>ICE primers</b>                                                                                 | <b>Primer sequences (5'-3')</b>                                                                                                                                    |
| TGFB1 forward<br>TGFB1 reverse<br>TGFB1 forward<br>TGFB1 reverse<br>LAMA4 forward<br>LAMA4 reverse | TTCGCTATCTCCTCCTCTCCAAGAC<br>TCCAAGCCTCCCCTCCACCACTG<br>AACCTGGGTCCAAATGTTGCTAC<br>AACAGACCTCAGAGGAAGTCCAC<br>AGAGTCTAGCGGATGAACTCAGAG<br>ACTCTCCCTTACTCTCGCACTTTC |
